# Supplementary material
Source: PubMed Central journal article supplement (PMC4719704)
Supplement: supp_djr219_JNCI_10_1727_s01.pdf [file supp_djr219_JNCI_10_1727_s01.pdf]

## Supplemental Materials

### Supplementary Method

Nominally statistically significant meta-analysis results were graded on the basis of the Human Genome and Epidemiology Network Venice criteria. The amount of evidence, consistency of replication, and protection from bias were considered. We rated the overall epidemiological credibility of nominally statistically significant meta-analysis results as strong (A) if associations received A grades in all three categories, moderate (B) if they received at least one B grade but no C grades, and weak (C) if they received a C grade in any of the three assessment criteria. For the ratings for the amount of evidence, we assigned a grade A when the total number of minor alleles of patients and control subject samples combined in the meta-analyses exceeded 1000 individuals, grade B when the total number was between 100 and 1000 individuals, and grade C when the total number was less than 100 individuals. For consistent replication grading, we assigned a grade A for  $I^2$  point estimates of no more than 25%, a grade B for  $I^2$  values of 25%–50%, and a grade C for  $I^2$  values greater than 50%. Note that this criterion does not apply to meta-analyses with  $P < 1 \times 10^{-7}$  after exclusion of the initial dataset(s) (37). For protection from bias, the guidelines propose consideration of various potential sources of bias, including errors in phenotypes, genotypes, and confounding (population stratification).

Furthermore the following potential sources of bias at the meta-analysis level were assessed.

Whenever the summary odds ratio deviated less than 1.15-fold from the null in meta-analyses on the basis of published data, we acknowledged that occult publication and other sources of uncontrollable bias alone may invalidate the association and we therefore assigned a grade C. If the association was no longer nominally statistically significant ( $P < .05$ ) on exclusion of the initial study or on exclusion of studies violating Hardy-Weinberg equilibrium in control subjects, a grade C was assigned as well. Also, we assigned a grade C if the modified regression test (38) showed evidence for publication or small-study

bias, and/or if the excess of statistical significance (39) suggested the possibility of statistical significance-chasing bias. This criterion did not apply to meta-analyses with  $P < 1 \times 10^{-7}$  (including all data for prospective analyses such as genome-wide association studies and after exclusion of the initial studies for retrospective analyses).

**Supplementary Table 1.** Random-effects results of the main meta-analyses using allelic contrasts for all polymorphisms with data from at least four independent case-control datasets, including genome-wide association studies (GWAS) and GWAS replicating studies as of July 31<sup>st</sup> 2010 †‡

| Chromosome | Gene (nearest gene) | Polymorphism       | Location (bp) § | Allele contrast | No. of datasets | No. of subjects | MAF   | OR (95% CI)         | P                     | Amount of evidence | No. of minor alleles | Venice replication grade | I <sup>2</sup> | Venice bias grade | Bias reason | Venice overall grade |
|------------|---------------------|--------------------|-----------------|-----------------|-----------------|-----------------|-------|---------------------|-----------------------|--------------------|----------------------|--------------------------|----------------|-------------------|-------------|----------------------|
| 1p13.3     | <i>GSTM1</i>        | GSTM1*0            | 215276998       | wt vs *0        | 5               | 2239            | 0.283 | 1.12 (0.89 to 1.41) | .321                  | NA                 | NA                   | NA                       | NA             | NA                | NA          | NA                   |
| 4q25       | <i>EGF</i>          | rs4444903          | 110834110       | G vs A          | 5               | 2987            | 0.409 | 1.14 (0.88 to 1.47) | .314                  | NA                 | NA                   | NA                       | NA             | NA                | NA          | NA                   |
| 5p15.33    | <i>CLPTMIL</i>      | rs401681           | 1322087         | T vs C          | 7               | 47195           | 0.450 | 1.15 (1.08 to 1.22) | 9.6x10 <sup>-6</sup>  | A                  | 42771                | B                        | 27             | C                 | Low OR      | C                    |
| 5p13.2     | <i>SLC45A2</i>      | rs16891982         | 33951693        | C vs G          | 9               | 14880           | 0.068 | 0.40 (0.33 to 0.47) | 4x10 <sup>-27</sup>   | A                  | 1644                 | Al                       | 29             | Al                | NA          | A                    |
| 9p23       | <i>(TYRP1)</i>      | rs1408799          | 12672097        | T vs C          | 4               | 43166           | 0.258 | 0.86 (0.80 to 0.93) | 9.1x10 <sup>-5</sup>  | A                  | 22196                | A                        | 0              | A                 | NA          | A                    |
| 9p21.3     | <i>CDKN2A</i>       | rs3088440          | 21968159        | T vs C          | 4               | 3867            | 0.077 | 1.25 (1.03 to 1.51) | .026                  | B                  | 704                  | A                        | 24             | C                 | F, HWE      | C                    |
| 9p21.3     | <i>CDKN2A</i>       | rs11515            | 21968199        | G vs C          | 4               | 3867            | 0.127 | 1.15 (1.01 to 1.32) | .039                  | A                  | 1019                 | A                        | 0              | C                 | F           | C                    |
| 9p21.3     | <i>CDKN2A</i>       | rs3731249          | 21970916        | A vs G          | 6               | 5794            | 0.025 | 1.28 (0.84 to 1.97) | .254                  | NA                 | NA                   | NA                       | NA             | NA                | NA          | NA                   |
| 11q14.3    | <i>TYR</i>          | rs1042602          | 88911696        | A vs C          | 9               | 53589           | 0.316 | 0.95 (0.90 to 0.99) | .021                  | A                  | 34179                | A                        | 0              | C                 | Low OR, F   | C                    |
| 11q14.3    | <i>TYR</i>          | rs1393350          | 89011046        | A vs G          | 4               | 10092           | 0.269 | 1.27 (1.16 to 1.39) | 8.7x10 <sup>-8</sup>  | A                  | 5763                 | Al                       | 35             | Al                | NA          | A                    |
| 11q14.3    | <i>TYR</i>          | rs1126809          | 89017961        | A vs G          | 6               | 46939           | 0.295 | 1.22 (1.14 to 1.31) | 2.7x10 <sup>-8</sup>  | A                  | 27940                | Al                       | 29             | Al                | NA          | A                    |
| 12q13.11   | <i>VDR</i>          | rs731236           | 48238757        | C vs T          | 6               | 7070            | 0.390 | 0.95 (0.85 to 1.07) | .413                  | NA                 | NA                   | NA                       | NA             | NA                | NA          | NA                   |
| 12q13.11   | <i>VDR</i>          | rs1544410          | 48239835        | A vs G          | 6               | 7440            | 0.400 | 0.89 (0.82 to 0.97) | .0065                 | A                  | 5857                 | A                        | 24             | C                 | Low OR      | C                    |
| 12q13.11   | <i>VDR</i>          | rs2228570          | 48272895        | A vs G          | 8               | 8455            | 0.387 | 1.11 (0.98 to 1.24) | .093                  | NA                 | NA                   | NA                       | NA             | NA                | NA          | NA                   |
| 12q13.11   | <i>(VDR)</i>        | rs4516035          | 48299826        | G vs A          | 7               | 6566            | 0.437 | 1.00 (0.89 to 1.13) | .984                  | NA                 | NA                   | NA                       | NA             | NA                | NA          | NA                   |
| 14q32.33   | <i>XRCC3</i>        | rs861539           | 104165753       | T vs C          | 5               | 3607            | 0.375 | 1.05 (0.85 to 1.29) | .661                  | NA                 | NA                   | NA                       | NA             | NA                | NA          | NA                   |
| 15q13.1    | <i>OCA2</i>         | rs7495174          | 28344238        | G vs A          | 5               | 42367           | 0.036 | 0.93 (0.83 to 1.04) | .199                  | NA                 | NA                   | NA                       | NA             | NA                | NA          | NA                   |
| 16q24.3    | <i>MC1R</i>         | rs61996344 (F45L)  | 89985799        | C vs T          | 4               | 1333            | 0.002 | 1.12 (0.25 to 4.95) | .886                  | NA                 | NA                   | NA                       | NA             | NA                | NA          | NA                   |
| 16q24.3    | <i>MC1R</i>         | rs1805005 (V60L)   | 89985844        | T vs G          | 21              | 24816           | 0.114 | 1.13 (1.02 to 1.26) | .024                  | A                  | 5951                 | C                        | 56             | C                 | Low OR      | C                    |
| 16q24.3    | <i>MC1R</i>         | rs34474212 (S83P)  | 89985913        | C vs T          | 5               | 1264            | 0.003 | 2.34 (0.74 to 7.38) | .147                  | NA                 | NA                   | NA                       | NA             | NA                | NA          | NA                   |
| 16q24.3    | <i>MC1R</i>         | rs1805006 (D84E)   | 89985918        | A vs C          | 19              | 23336           | 0.009 | 1.47 (1.18 to 1.83) | 6.4x10 <sup>-4</sup>  | B                  | 487                  | A                        | 0              | A                 | NA          | B                    |
| 16q24.3    | <i>MC1R</i>         | rs2228479 (V92M)   | 89985940        | A vs G          | 20              | 22745           | 0.076 | 1.06 (0.97 to 1.15) | .186                  | NA                 | NA                   | NA                       | NA             | NA                | NA          | NA                   |
| 16q24.3    | <i>MC1R</i>         | rs34158934 (T95M)  | 89985950        | T vs C          | 7               | 4094            | 0.001 | 1.31 (0.47 to 3.65) | .608                  | NA                 | NA                   | NA                       | NA             | NA                | NA          | NA                   |
| 16q24.3    | <i>MC1R</i>         | V122M              | 89986030        | A vs G          | 5               | 2268            | 0.003 | 1.01 (0.32 to 3.21) | .987                  | NA                 | NA                   | NA                       | NA             | NA                | NA          | NA                   |
| 16q24.3    | <i>MC1R</i>         | rs11547464 (R142H) | 89986091        | A vs G          | 16              | 10606           | 0.010 | 1.67 (1.26 to 2.21) | 3.7x10 <sup>-4</sup>  | B                  | 250                  | A                        | 7              | A                 | NA          | B                    |
| 16q24.3    | <i>MC1R</i>         | rs1805007 (R151C)  | 89986117        | T vs C          | 21              | 27747           | 0.078 | 1.83 (1.56 to 2.15) | 2.1x10 <sup>-13</sup> | A                  | 4764                 | Al                       | 69             | Al                | NA          | A                    |
| 16q24.3    | <i>MC1R</i>         | Y152X              | 89986122        | A vs C          | 8               | 4193            | 0.001 | 1.56 (0.54 to 4.52) | .415                  | NA                 | NA                   | NA                       | NA             | NA                | NA          | NA                   |

|          |              |                   |          |          |    |       |       |                     |                       |    |      |    |    |    |                   |    |
|----------|--------------|-------------------|----------|----------|----|-------|-------|---------------------|-----------------------|----|------|----|----|----|-------------------|----|
| 16q24.3  | <i>MC1R</i>  | rs1110400 (I155T) | 89986130 | C vs T   | 19 | 22506 | 0.010 | 1.23 (0.99 to 1.52) | .062                  | NA | NA   | NA | NA | NA | NA                | NA |
| 16q24.3  | <i>MC1R</i>  | rs1805008 (R160W) | 89986144 | T vs C   | 22 | 27368 | 0.098 | 1.54 (1.33 to 1.79) | 1.7x10 <sup>-8</sup>  | A  | 5526 | Al | 67 | Al | Regr              | A  |
| 16q24.3  | <i>MC1R</i>  | rs885479 (R163Q)  | 89986154 | A vs G   | 20 | 52153 | 0.041 | 1.09 (0.97 to 1.22) | .163                  | NA | NA   | NA | NA | NA | NA                | NA |
| 16q24.3  | <i>MC1R</i>  | R213W             | 89986303 | T vs C   | 5  | 2505  | 0.002 | 3.04 (1.17 to 7.91) | .023                  | C  | 23   | A  | 0  | A  | NA                | C  |
| 16q24.3  | <i>MC1R</i>  | K278E             | 89986498 | G vs A   | 5  | 1528  | 0.003 | 0.75 (0.17 to 3.31) | .708                  | NA | NA   | NA | NA | NA | NA                | NA |
| 16q24.3  | <i>MC1R</i>  | rs1805009 (D294H) | 89986546 | C vs G   | 20 | 24753 | 0.015 | 1.89 (1.51 to 2.38) | 3.3x10 <sup>-8</sup>  | B  | 949  | Al | 42 | Al | NA                | B  |
| 16q24.3  | <i>MC1R</i>  | rs2228478 (T314T) | 89986608 | G vs A   | 10 | 19013 | 0.098 | 1.12 (0.94 to 1.33) | .208                  | NA | NA   | NA | NA | NA | NA                | NA |
| 17p13.1  | <i>TP53</i>  | rs1042522         | 7579472  | C vs G   | 6  | 3392  | 0.231 | 1.06 (0.84 to 1.34) | .624                  | NA | NA   | NA | NA | NA | NA                | NA |
| 19q13.31 | <i>XRCC1</i> | rs25487           | 44055726 | A vs G   | 4  | 3504  | 0.364 | 1.03 (0.93 to 1.14) | .635                  | NA | NA   | NA | NA | NA | NA                | NA |
| 19q13.32 | <i>ERCC2</i> | rs13181           | 45854919 | C vs A   | 8  | 6427  | 0.382 | 1.00 (0.87 to 1.13) | .936                  | NA | NA   | NA | NA | NA | NA                | NA |
| 19q13.32 | <i>ERCC2</i> | rs1799793         | 45867259 | A vs G   | 5  | 5027  | 0.369 | 1.02 (0.93 to 1.12) | .662                  | NA | NA   | NA | NA | NA | NA                | NA |
| 20q11.22 | <i>ASIP</i>  | rs6058017         | 32856998 | G vs A   | 7  | 44247 | 0.089 | 0.89 (0.81 to 0.99) | .028                  | A  | 7965 | A  | 0  | C  | Low OR, HWE, Regr | C  |
| 20q11.22 | <i>PIGU</i>  | rs910873          | 33171772 | A vs G   | 4  | 6915  | 0.076 | 1.52 (1.36 to 1.70) | 1.9x10 <sup>-13</sup> | A  | 1425 | Al | 0  | Al | NA                | A  |
| 20q11.22 | <i>MYH7B</i> | rs1885120         | 33576989 | C vs G   | 4  | 6787  | 0.073 | 1.59 (1.41 to 1.79) | 7.4x10 <sup>-15</sup> | A  | 1306 | Al | 0  | Al | NA                | A  |
| 22q11.23 | <i>GSTT1</i> | GSTT1*0           | NA       | *0 vs wt | 5  | 2824  | 0.441 | 0.98 (0.88 to 1.09) | .709                  | NA | NA   | NA | NA | NA | NA                | NA |

† CI = confidence interval, F = statistical significance lost excluding first study, HWE = statistical significance lost excluding Hardy-Weinberg equilibrium-violating studies in control subjects, Low OR = an OR less than 1.15, MAF = minor allele frequency in controls when combining all eligible datasets, NA = not applicable, No. of minor alleles = number of minor alleles in patients and control subjects combined across all included datasets, OR = odds ratio, Regr = small-study effect, wt = wild type allele.

‡ Allelic odds ratios, 95% confidence intervals, and *P* values (two-sided) were calculated by the DerSimonian-Lairs random-effects model (32). Analysis included all ethnicities. Venice grading: A = strong epidemiologic credibility, B = modest epidemiologic credibility, C = weak epidemiologic credibility.

§ Location (in base pairs [bp]) is on the basis of the Human Genome build 19 (40). Note that GSTT1\*0 represents a gene deletion and therefore cannot be assigned to a specific location.

|| Criterion does not apply to meta-analysis results ( $P < 1 \times 10^{-7}$ ) after exclusion of the initial study (37).

**Supplementary Table 2.** Genetic variants associated with cutaneous melanoma identified by random-effects supplementary meta-analyses using allelic contrasts for polymorphisms with three independent case–control datasets available from genome-wide association studies (GWAS) and/or replication studies of GWAS in related traits as supplied in the respective publications as of 31<sup>st</sup> July 2010 \*†

| Chromosome | Gene (nearest gene)  | Polymorphism | Location (bp)‡ | Allele contrast | No. of datasets | No. of subjects§ | MAF   | OR (95% CI)         | P                     | Amount of evidence | No. of minor alleles | Venice replication grade | I <sup>2</sup> | Venice bias grade | Bias reason | Venice overall grade |
|------------|----------------------|--------------|----------------|-----------------|-----------------|------------------|-------|---------------------|-----------------------|--------------------|----------------------|--------------------------|----------------|-------------------|-------------|----------------------|
| 9p21.3     | ( <i>MTAP</i> )      | rs4636294    | 21747803       | G vs A          | 3               | 13005            | 0.485 | 0.82 (0.75 to 0.90) | 1.4x10 <sup>-5</sup>  | A                  | 12930                | C                        | 66             | A                 | NA          | C                    |
| 9p21.3     | ( <i>MTAP</i> )      | rs2218220    | 21756089       | T vs C          | 3               | 13005            | 0.487 | 0.84 (0.80 to 0.89) | 5.5x10 <sup>-11</sup> | A                  | 12930                | A                        | 0              | A                 | NA          | A                    |
| 9p21.3     | ( <i>MTAP</i> )      | rs1335510    | 21757803       | G vs T          | 3               | 10616            | 0.417 | 0.83 (0.78 to 0.89) | 5.9x10 <sup>-9</sup>  | A                  | 8550                 | A                        | 0              | A                 | NA          | A                    |
| 9p21.3     | <i>MTAP</i>          | rs10757257   | 21806564       | A vs G          | 3               | 10581            | 0.415 | 0.81 (0.76 to 0.86) | 3.0x10 <sup>-11</sup> | A                  | 8442                 | A#                       | 0              | A                 | NA          | A                    |
| 9p21.3     | <i>MTAP</i>          | rs7023329    | 21816528       | G vs A          | 3               | 12481            | 0.497 | 0.84 (0.80 to 0.89) | 3.1x10 <sup>-10</sup> | A                  | 12194                | A                        | 0              | A                 | NA          | A                    |
| 14q32      | ( <i>SLC24A4</i> )   | rs12896399   | 92773663       | G vs T          | 3               | 39730            | 0.452 | 1.02 (0.86 to 1.21) | .823                  | NA                 | NA                   | NA                       | NA             | NA                | NA          | NA                   |
| 15q13.1    | <i>OCA2</i>          | rs1800407    | 28230318       | T vs C          | 3               | 1722             | 0.070 | 1.40 (1.07 to 1.82) | .013                  | B                  | 280                  | A                        | 0              | A                 | NA          | B                    |
| 16q24.3    | <i>CDK10</i>         | rs258322     | 89755903       | A vs G          | 3               | 8992             | 0.095 | 1.66 (1.48 to 1.86) | 4x10 <sup>-18</sup>   | A                  | 2084                 | A                        | 28             | A                 | NA          | A                    |
| 16q24.3    | <i>AFG3L1</i>        | rs4785763    | 90066936       | A vs C          | 3               | 9158             | 0.328 | 1.36 (1.27 to 1.45) | 5x10 <sup>-20</sup>   | A                  | 6533                 | A                        | 0              | A                 | NA          | A                    |
| 20q11.21   | <i>C20orf71</i>      | rs17305657   | 31806588       | C vs T          | 3               | 3937             | 0.088 | 1.60 (1.27 to 2.01) | 6.3x10 <sup>-5</sup>  | B                  | 850                  | C                        | 59             | A                 | NA          | C                    |
| 20q11.21   | ( <i>C20orf114</i> ) | rs4911310    | 31861259       | G vs A          | 3               | 3941             | 0.292 | 0.83 (0.75 to 0.92) | 2.1x10 <sup>-4</sup>  | A                  | 2168                 | A                        | 0              | A                 | NA          | A                    |

|          |                      |            |          |        |   |      |       |                     |                      |    |      |    |    |    |        |    |
|----------|----------------------|------------|----------|--------|---|------|-------|---------------------|----------------------|----|------|----|----|----|--------|----|
| 20q11.21 | <i>C20orf114</i>     | rs2253335  | 31891003 | T vs C | 3 | 3916 | 0.392 | 1.01 (0.92 to 1.11) | .811                 | NA | NA   | NA | NA | NA | NA     | NA |
| 20q11.21 | ( <i>C20orf114</i> ) | rs721970   | 31903533 | A vs G | 3 | 4230 | 0.070 | 1.62 (1.35 to 1.95) | $3.4 \times 10^{-7}$ | B  | 752  | B  | 29 | A  | NA     | B  |
| 20q11.21 | <i>CDK5RAP1</i>      | rs291671   | 31950845 | C vs T | 3 | 3960 | 0.100 | 1.46 (1.16 to 1.83) | .0012                | B  | 934  | C  | 63 | A  | NA     | C  |
| 20q11.22 | <i>E2F1</i>          | rs3213182  | 32263233 | G vs T | 3 | 3806 | 0.111 | 0.93 (0.77 to 1.34) | .492                 | NA | NA   | NA | NA | NA | NA     | NA |
| 20q11.22 | <i>E2F1</i>          | rs2071054  | 32265839 | C vs T | 3 | 3868 | 0.298 | 1.22 (1.11 to 1.34) | $5.3 \times 10^{-5}$ | A  | 2456 | A  | 0  | A  | NA     | A  |
| 20q11.22 | ( <i>RALY</i> )      | rs6142047  | 32514386 | C vs T | 3 | 4273 | 0.454 | 1.20 (1.10 to 1.31) | $2.5 \times 10^{-5}$ | A  | 4074 | A  | 0  | A  | NA     | A  |
| 20q11.22 | ( <i>RALY</i> )      | rs17091405 | 32515916 | C vs G | 3 | 4082 | 0.118 | 1.00 (0.84 to 1.19) | .972                 | NA | NA   | NA | NA | NA | NA     | NA |
| 20q11.22 | ( <i>RALY</i> )      | rs4911379  | 32535305 | A vs C | 3 | 3898 | 0.336 | 1.21 (1.10 to 1.33) | $6.2 \times 10^{-5}$ | A  | 2776 | A  | 0  | C  | Regr   | C  |
| 20q11.22 | ( <i>RALY</i> )      | rs6059592  | 32552643 | G vs T | 3 | 4247 | 0.074 | 0.82 (0.59 to 1.15) | .241                 | NA | NA   | NA | NA | NA | NA     | NA |
| 20q11.22 | ( <i>RALY</i> )      | rs2064348  | 32564078 | T vs C | 3 | 4031 | 0.100 | 0.98 (0.79 to 1.22) | .866                 | NA | NA   | NA | NA | NA | NA     | NA |
| 20q11.22 | <i>RALY</i>          | rs2284378  | 32588095 | T vs C | 3 | 3994 | 0.332 | 1.21 (1.10 to 1.32) | $6.4 \times 10^{-5}$ | A  | 2818 | A  | 0  | A  | NA     | A  |
| 20q11.22 | <i>RALY</i>          | rs6141443  | 32601929 | G vs C | 3 | 4039 | 0.164 | 0.91 (0.80 to 1.02) | .102                 | NA | NA   | NA | NA | NA | NA     | NA |
| 20q11.22 | <i>RALY</i>          | rs13043392 | 32606735 | C vs A | 3 | 4015 | 0.362 | 0.93 (0.85 to 1.20) | .124                 | NA | NA   | NA | NA | NA | NA     | NA |
| 20q11.22 | <i>RALY</i>          | rs2268089  | 32667298 | A vs G | 3 | 4062 | 0.326 | 1.23 (1.12 to 1.35) | $1.1 \times 10^{-5}$ | A  | 2834 | A  | 0  | A  | NA     | A  |
| 20q11.22 | ( <i>ASIP</i> )      | rs819163   | 32842357 | G vs T | 3 | 4079 | 0.124 | 0.83 (0.70 to 0.99) | .040                 | B  | 936  | B  | 36 | A  | NA     | B  |
| 20q11.22 | ( <i>ASIP</i> )      | rs6059743  | 32847711 | A vs G | 3 | 3943 | 0.429 | 0.91 (0.83 to 0.99) | .036                 | A  | 3297 | A  | 0  | C  | Low OR | C  |
| 20q11.22 | <i>ASIP</i>          | rs819162   | 32852282 | T vs A | 3 | 4158 | 0.120 | 0.82 (0.71 to 0.95) | .0094                | B  | 920  | A  | 10 | A  | NA     | B  |
| 20q11.22 | <i>ITCH</i>          | rs7266300  | 33037408 | T vs A | 3 | 3989 | 0.066 | 0.80 (0.58 to 1.12) | .201                 | NA | NA   | NA | NA | NA | NA     | NA |
| 20q11.22 | ( <i>MAP1LC3A</i> )  | rs6088519  | 33132191 | T vs C | 3 | 4101 | 0.278 | 0.95 (0.86 to 1.05) | .291                 | NA | NA   | NA | NA | NA | NA     | NA |



|          |                     |           |          |        |   |       |       |                      |                      |    |      |    |    |    |        |    |
|----------|---------------------|-----------|----------|--------|---|-------|-------|----------------------|----------------------|----|------|----|----|----|--------|----|
| 20q11.22 | ( <i>MAP1LC3A</i> ) | rs6088520 | 33132364 | T vs C | 3 | 4191  | 0.478 | 0.88 (0.80 to 0.95)  | .0025                | A  | 3866 | A  | 0  | C  | Low OR | C  |
| 20q11.22 | ( <i>MAP1LC3A</i> ) | rs2424994 | 33132917 | T vs C | 3 | 4075  | 0.174 | 1.30 (1.15 to 1.47)  | $2.9 \times 10^{-5}$ | A  | 1577 | A  | 18 | A  | NA     | A  |
| 20q11.22 | <i>PIGU</i>         | rs6142206 | 33212055 | T vs C | 3 | 3961  | 0.413 | 0.91 (0.83 to 0.99)  | .044                 | A  | 3189 | A  | 0  | C  | Low OR | C  |
| 20q11.22 | <i>TP53INP2</i>     | rs6060003 | 33294945 | C vs T | 3 | 4285  | 0.454 | 0.86 (0.79 to -0.94) | $5.1 \times 10^{-4}$ | A  | 3725 | A  | 0  | A  | NA     | A  |
| 20q11.22 | <i>NCOA6</i>        | rs959829  | 33346047 | G vs A | 3 | 4203  | 0.374 | 0.96 (0.84 to 1.10)  | .495                 | NA | NA   | NA | NA | NA | NA     | NA |
| 20q11.22 | <i>NCOA6</i>        | rs7271289 | 33397303 | A vs G | 3 | 3983  | 0.182 | 1.34 (1.11 to 1.62)  | .0024                | A  | 1634 | C  | 66 | A  | NA     | C  |
| 20q11.22 | <i>NCOA6</i>        | rs6088619 | 33411871 | C vs T | 3 | 3932  | 0.132 | 0.90 (0.78 to 1.05)  | .169                 | NA | NA   | NA | NA | NA | NA     | NA |
| 20q11.23 | <i>PHF20</i>        | rs6058339 | 34460479 | C vs T | 3 | 3957  | 0.102 | 1.43 (1.25 to 1.64)  | $2.9 \times 10^{-7}$ | B  | 945  | A  | 0  | A  | NA     | B  |
| 20q11.23 | <i>LOC647979</i>    | rs1204552 | 34638903 | A vs T | 3 | 4063  | 0.070 | 1.59 (1.36 to 1.87)  | $7.1 \times 10^{-9}$ | B  | 716  | A  | 3  | A  | NA     | B  |
| 22q13.1  | <i>PLA2G6</i>       | rs2284063 | 38544298 | G vs A | 3 | 12690 | 0.366 | 0.85 (0.75 to 0.96)  | .010                 | A  | 8936 | C  | 81 | C  | F      | C  |
| 22q13.1  | <i>PLA2G6</i>       | rs6001027 | 38545619 | G vs A | 3 | 12690 | 0.363 | 0.86 (0.77 to 0.96)  | .0051                | A  | 8885 | C  | 73 | C  | F      | C  |

\* CI = confidence interval, F = statistical significance lost excluding the first study, Low OR = an OR less than 1.15, MAF = minor allele frequency in controls when combining all eligible datasets, NA = not applicable, No. of minor alleles = number of minor alleles in patients and control subjects combined across all included datasets, OR = odds ratio, Regr = small-study effect.

† Allelic odds ratios, 95% confidence intervals, and *P* values (two-sided) were calculated by the DerSimonian-Lairs random-effects model (32). Analysis included all ethnicities. Venice grading: A = strong epidemiologic credibility, B = modest epidemiologic credibility, C = weak epidemiologic credibility.

‡ Location (in base pairs, bp) is on the basis of the Human Genome build 19 (40).

§ For inclusion of GWAS and other large-scale study data which only provided odds ratios, confidence intervals, and/or  $P$  values, we estimated genotype summary counts and the number of analyzed patient and control subjects on the basis of the reported data, control allele frequencies, and overall effective number of subjects for the purpose of Venice grading. Thus the listed number of subjects and the number of minor alleles are only approximations of the real numbers

|| Criterion does not apply to meta-analysis results ( $P < 1 \times 10^{-7}$ ) after exclusion of the initial study (37).

**Supplementary Table 3.** Comparison of all previously published meta-analysis results and those obtained from the main and supplementary meta-analyses in this study as of July 31<sup>st</sup> 2010 †,‡

| Gene (nearest gene) | Polymorphism      | Allele contrast | Prior study author, year (reference) | Prior study funding source              | Study design notes                                                                                         | Prior no. of subjects (datasets) | Prior meta OR (95% CI) | Prior P               | MelGene no. of subjects |
|---------------------|-------------------|-----------------|--------------------------------------|-----------------------------------------|------------------------------------------------------------------------------------------------------------|----------------------------------|------------------------|-----------------------|-------------------------|
| <i>EGF</i>          | rs4444903         | G vs A          | NMA                                  | NA                                      | NA                                                                                                         | NA                               | NA                     | NA                    | 2987 (5)                |
| <i>CLPTM1L</i>      | rs401681          | T vs C          | NMA                                  | NA                                      | NA                                                                                                         | NA                               | NA                     | NA                    | 47195 (7)               |
| <i>SLC45A2</i>      | rs16891982        | C vs G          | Gerstenblith, 2010 (43)              | Intramural Research Program of NIH, NCI | Included a family-based study(49) and six independent datasets from Stacey et al. 2009 (30) as one dataset | 17876 (3)                        | 0.38 (0.26 to 0.55)    | 3.3x10 <sup>-7</sup>  | 14880 (9)               |
| ( <i>TYRP1</i> )    | rs1408799         | T vs C          | NMA                                  | NA                                      | NA                                                                                                         | NA                               | NA                     | NA                    | 43166 (4)               |
| ( <i>MTAP</i> )     | rs4636294         | G vs A          | Gerstenblith, 2010 (43)              | Intramural Research Program of NIH, NCI | NP                                                                                                         | 11689 (3)                        | 0.83 (0.76 to 0.91)    | 5.1x10 <sup>-5</sup>  | 13005 (3)‡‡             |
| ( <i>MTAP</i> )     | rs2218220         | T vs C          | Gerstenblith, 2010 (43)              | Intramural Research Program of NIH, NCI | NP                                                                                                         | 11689 (3)                        | 0.83 (0.78 to 0.89)    | 3.6x10 <sup>-7</sup>  | 13005 (3) ‡‡            |
| ( <i>MTAP</i> )     | rs1335510         | G vs T          | Gerstenblith, 2010 (43)              | Intramural Research Program of NIH, NCI | NP                                                                                                         | 11689 (3)                        | 0.84 (0.79 to 0.90)    | 1.8x10 <sup>-7</sup>  | 10616 (3) ‡‡            |
| <i>MTAP</i>         | rs10757257        | A vs G          | Gerstenblith, 2010 (43)              | Intramural Research Program of NIH, NCI | NP                                                                                                         | 11689 (3)                        | 0.82 (0.77 to 0.88)    | 6.6x10 <sup>-10</sup> | 10581 (3) ‡‡            |
| <i>MTAP</i>         | rs7023329         | G vs A          | Gerstenblith, 2010 (43)              | Intramural Research Program of NIH, NCI | Used a fixed-effect model                                                                                  | 11689 (3)                        | 0.83 (0.79 to 0.88)    | 2.7x10 <sup>-11</sup> | 12481(3) ‡‡             |
| <i>CDKN2A</i>       | rs3088440         | T vs C          | NMA                                  | NA                                      | NA                                                                                                         | NA                               | NA                     | NA                    | 3867 (4)                |
| <i>CDKN2A</i>       | rs11515           | G vs C          | NMA                                  | NA                                      | NA                                                                                                         | NA                               | NA                     | NA                    | 3867 (4)                |
| <i>CDKN2A</i>       | rs3731249         | A vs G          | NMA                                  | NA                                      | NA                                                                                                         | NA                               | NA                     | NA                    | 5794 (6)                |
| <i>TYR</i>          | rs1042602         | A vs C          | NMA                                  | NA                                      | NA                                                                                                         | NA                               | NA                     | NA                    | 53589 (9)               |
| <i>TYR</i>          | rs1393350         | A vs G          | Gerstenblith, 2010 (43)              | Intramural Research Program of NIH, NCI | Included replication datasets REP1 and REP2 of Bishop, 2009 (15) as one dataset                            | 10695 (3)                        | 1.21 (1.02 to 1.42)    | .02                   | 10092 (4)               |
| <i>TYR</i>          | rs1126809 (R402Q) | A vs G          | Gerstenblith, 2010 (43)              | Intramural Research Program of NIH, NCI | Included a family-based study (49), included replication datasets REP1 and                                 | 52722 (3)                        | 1.23 (1.16 to 1.29)    | 1.8x10 <sup>-14</sup> | 46939 (6)               |

|           |                   |        |                           |                                |                                                                                                                               |          |                     |        |              |
|-----------|-------------------|--------|---------------------------|--------------------------------|-------------------------------------------------------------------------------------------------------------------------------|----------|---------------------|--------|--------------|
| VDR       | rs731236 (TaqI)   | C vs T | Mocellin, 2008 (44)       | NP                             | REP2 of Bishop, 2009 (15) as one dataset, and included three independent datasets from Gudbjartsson, 2008 (28) as one dataset | 2000 (2) | NP                  | .07    | 7070 (6)     |
| VDR       | rs731236 (TaqI)   | C vs T | Randerson-Moor, 2009 (45) | Cancer Research UK, NIH, ScaRF | Performed meta-analyses by comparing the genotype combinations§                                                               | 4779 (5) | 0.95 (0.75 to 1.20) | .671   | 7070 (6)     |
| VDR       | rs1544410 (BsmI)  | A vs G | Mocellin, 2008 (44)       | NP                             | Applied a model-free approach (50), which imposed a recessive genetic model                                                   | 2896 (3) | 1.30 (1.11 to 1.53) | .002   | 7440 (6)     |
| VDR       | rs1544410 (BsmI)  | A vs G | Randerson-Moor, 2009 (45) | Cancer Research UK, NIH, ScaRF | Performed meta-analyses by comparing the genotype combinations§                                                               | 5185 (5) | 0.81 (0.72 to 0.92) | .00081 | 7440 (6)     |
| VDR       | rs1544410 (BsmI)  | A vs G | Gandini, 2009 (46)        | NP                             | Performed fixed-effect or random-effects meta-analyses#                                                                       | 2896 (3) | 0.84 (0.75 to 0.94) | .0021  | 7440 (6)     |
| VDR       | rs2228570 (FokI)  | A vs G | Gandini, 2009 (46)        | NP                             | Performed fixed-effect or random-effects meta-analyses#                                                                       | 3318 (4) | 1.13 (1.01 to 1.25) | .031   | 8455 (8)     |
| VDR       | rs2228570 (FokI)  | A vs G | Mocellin, 2008 (44)       | NP                             | NP                                                                                                                            | 3318 (4) | 1.09 (0.99 to 1.21) | .07    | 8455 (8)     |
| VDR       | rs2228570 (FokI)  | A vs G | Randerson-Moor, 2009 (45) | Cancer Research UK, NIH, ScaRF | Performed meta-analyses by comparing the genotype combinations§                                                               | 6114 (7) | 1.19 (1.05 to 1.35) | .011   | 8455 (8)     |
| VDR       | rs4516035 (EcoRV) | G vs A | Mocellin, 2008 (44)       | NP                             | NP                                                                                                                            | 1463 (3) | NP                  | NP     | 6566 (7)     |
| VDR       | rs4516035 (EcoRV) | G vs A | Randerson-Moor, 2009 (45) | Cancer Research UK, NIH, ScaRF | Performed meta-analyses by comparing the genotype combinations§                                                               | 3754 (5) | 1.06 (0.86 to 1.30) | .581   | 6566 (7)     |
| VDR       | rs11568820 (Cdx2) | A vs G | Randerson-Moor, 2009 (45) | Cancer Research UK, NIH, ScaRF | Performed meta-analyses by comparing the genotype combinations§                                                               | 3347 (3) | 0.96 (0.82 to 1.12) | .831   | NA           |
| (SLC24A4) | rs12896399        | G vs T | NMA                       | NA                             | NA                                                                                                                            | NA       | NA                  | NA     | 39730 (3) †† |
| XRCC3     | rs861539          | T vs C | NMA                       | NA                             | NA                                                                                                                            | NA       | NA                  | NA     | 3607 (5)     |
| OCA2      | rs1800407         | T vs C | NMA                       | NA                             | NA                                                                                                                            | NA       | NA                  | NA     | 1722 (3) ††  |

|                 |                    |        |                         |                                         |                                                                                 |           |                     |                       |             |
|-----------------|--------------------|--------|-------------------------|-----------------------------------------|---------------------------------------------------------------------------------|-----------|---------------------|-----------------------|-------------|
| <i>OCA2</i>     | rs7495174          | G vs A | NMA                     | NA                                      | NA                                                                              | NA        | NA                  | NA                    | 42367 (5)   |
| <i>C16orf55</i> | rs7188458          | A vs G | Gerstenblith, 2010 (43) | Intramural Research Program of NIH, NCI | NP                                                                              | 7569 (2)  | 1.30 (1.21 to 1.40) | 1.2x10 <sup>-12</sup> | NA          |
| <i>CDK10</i>    | rs258322           | A vs G | Gerstenblith, 2010 (43) | Intramural Research Program of NIH, NCI | Included replication datasets REP1 and REP2 of Bishop, 2009 (15) as one dataset | 10165 (2) | 1.67 (1.52 to 1.83) | 2.5x10 <sup>-27</sup> | 8992 (3) ‡‡ |
| <i>MC1R</i>     | rs61996344 (F45L)  | C vs T | NMA                     | NA                                      | NA                                                                              | NA        | NA                  | NA                    | 1333 (4)    |
| <i>MC1R</i>     | rs1805005 (V60L)   | T vs G | Raimondi, 2008 (47)     | NP                                      | Included a family-based study (51)                                              | 5065 (10) | 1.15 (0.92 to 1.43) | .211                  | 24816 (21)  |
| <i>MC1R</i>     | rs34474212 (S83P)  | C vs T | NMA                     | NA                                      | NA                                                                              | NA        | NA                  | NA                    | 1264 (5)    |
| <i>MC1R</i>     | rs1805006 (D84H)   | A vs C | Raimondi, 2008 (47)     | NP                                      | Included a family-based study (51)                                              | 3044 (8)  | 2.40 (1.50 to 3.84) | .00031                | 23336 (19)  |
| <i>MC1R</i>     | rs2228479 (V92M)   | A vs G | Raimondi, 2008 (47)     | NP                                      | Included a family-based study (51)                                              | 4266 (10) | 1.22 (0.99 to 1.50) | .061                  | 22745 (20)  |
| <i>MC1R</i>     | rs34158934 (T95M)  | T vs C | NMA                     | NA                                      | NA                                                                              | NA        | NA                  | NA                    | 4094 (7)    |
| <i>MC1R</i>     | V122M              | A vs G | NMA                     | NA                                      | NA                                                                              | NA        | NA                  | NA                    | 2268 (5)    |
| <i>MC1R</i>     | rs11547464 (R142H) | A vs G | Raimondi, 2008 (47)     | NP                                      | Included a family-based study (51)                                              | 2712 (7)  | 1.66 (1.01 to 2.75) | .051                  | 10606 (16)  |
| <i>MC1R</i>     | rs1805007 (R151C)  | T vs C | Gerstenblith, 2010 (43) | Intramural Research Program of NIH, NCI | Included a family-based study (49) and used a fixed-effect model                | 17209 (2) | 1.49 (1.32 to 1.70) | 4.3x10 <sup>-10</sup> | 27747 (21)  |
| <i>MC1R</i>     | rs1805007 (R151C)  | T vs C | Raimondi, 2008 (47)     | NP                                      | Included a family-based study (51)                                              | 5047 (10) | 1.78 (1.45 to 2.20) | 6x10 <sup>-8</sup> 1  | 27747 (21)  |
| <i>MC1R</i>     | Y152X              | A vs C | NMA                     | NA                                      | NA                                                                              | NA        | NA                  | NA                    | 4193 (8)    |
| <i>MC1R</i>     | rs1110400 (I155T)  | C vs T | Raimondi, 2008 (47)     | NP                                      | Included a family-based study (51)                                              | 2950 (6)  | 2.45 (1.32 to 4.55) | .0051                 | 22506 (19)  |
| <i>MC1R</i>     | rs1805008 (R160W)  | T vs C | Gerstenblith, 2010 (43) | Intramural Research Program of NIH, NCI | Included a family-based study (49)                                              | 18582(2)  | 1.42 (1.08 to 1.87) | .01                   | 27368 (22)  |
| <i>MC1R</i>     | rs1805008 (R160W)  | T vs C | Raimondi, 2008 (47)     | NP                                      | Included a family-based study (51)                                              | 5064 (10) | 1.43 (1.20 to 1.70) | 6x10 <sup>-5</sup> 1  | 27368 (22)  |
| <i>MC1R</i>     | rs885479 (R163Q)   | A vs G | Raimondi, 2008 (47)     | NP                                      | Included a family-based study (51)                                              | 4347 (8)  | 1.42 (1.09 to 1.85) | .0091                 | 52153 (20)  |
| <i>MC1R</i>     | R213W              | T vs C | NMA                     | NA                                      | NA                                                                              | NA        | NA                  | NA                    | 2505 (5)    |
| <i>MC1R</i>     | K278E              | G vs A | NMA                     | NA                                      | NA                                                                              | NA        | NA                  | NA                    | 1528 (5)    |
| <i>MC1R</i>     | rs1805009 (D294H)  | C vs G | Raimondi, 2008 (47)     | NP                                      | Included a family-based study (51)                                              | 4473 (10) | 1.77 (1.17 to 2.69) | .0071                 | 24753 (20)  |
| <i>MC1R</i>     | rs2228478 (T314T)  | G vs A | NMA                     | NA                                      | NA                                                                              | NA        | NA                  | NA                    | 19013 (10)  |
| <i>AFG3LI</i>   | rs4785763          | A vs C | Gerstenblith, 2010 (43) | Intramural Research Program of NIH, NCI | Included replication datasets REP1 and REP2 of Bishop, 2009 (15) as one dataset | 10165 (2) | 1.36 (1.28 to 1.45) | 6x10 <sup>-22</sup>   | 9158 (3) ‡‡ |

|                    |            |          |                         |                     |                                                                     |          |                     |                       |                |
|--------------------|------------|----------|-------------------------|---------------------|---------------------------------------------------------------------|----------|---------------------|-----------------------|----------------|
| <i>TP53</i>        | rs1042522  | C vs G   | NMA                     | NA                  | NA                                                                  | NA       | NA                  | NA                    | 3392 (6)       |
| <i>XRCC1</i>       | rs25487    | A vs G   | Mocellin, 2009 (48)     | NP                  | NP                                                                  | 3504 (4) | 1.02 (0.93 to 1.13) | .63                   | 3504 (4)       |
| <i>ERCC2</i>       | rs13181    | C vs A   | Mocellin, 2009 (48)     | NP                  | Applied a model-free approach (50), which imposed an additive model | 6006 (8) | 1.12 (1.03 to 1.21) | .01                   | 6427 (8)       |
| <i>ERCC2</i>       | rs1799793  | A vs G   | Mocellin, 2009 (48)     | NP                  | NP                                                                  | 3228 (3) | 1.04 (0.93 to 1.15) | .50                   | 5027 (5)       |
| <i>GSTM1</i>       | GSTM1*0    | wt vs *0 | NMA                     | NA                  | NA                                                                  | NA       | NA                  | NA                    | 2239 (5)       |
| <i>C20orf71</i>    | rs17305657 | C vs T   | NMA                     | NA                  | NA                                                                  | NA       | NA                  | NA                    | 3937 (3) ††    |
| <i>C20orf114</i>   | rs4911310  | G vs A   | NMA                     | NA                  | NA                                                                  | NA       | NA                  | NA                    | 3941 (3) ††    |
| <i>C20orf114</i>   | rs2253335  | T vs C   | NMA                     | NA                  | NA                                                                  | NA       | NA                  | NA                    | 3916 (3) ††    |
| <i>(C20orf114)</i> | rs721970   | A vs G   | NMA                     | NA                  | NA                                                                  | NA       | NA                  | NA                    | 4230 (3) ††    |
| <i>CDK5RAP1</i>    | rs291671   | C vs T   | NMA                     | NA                  | NA                                                                  | NA       | NA                  | NA                    | 3960 (3) ††    |
| <i>E2F1</i>        | rs3213182  | G vs T   | NMA                     | NA                  | NA                                                                  | NA       | NA                  | NA                    | 3806 (3) ††    |
| <i>E2F1</i>        | rs2071054  | C vs T   | NMA                     | NA                  | NA                                                                  | NA       | NA                  | NA                    | 3868 (3) ††    |
| <i>(RALY)</i>      | rs6142047  | C vs T   | NMA                     | NA                  | NA                                                                  | NA       | NA                  | NA                    | 4273 (3) ††    |
| <i>(RALY)</i>      | rs17091405 | C vs G   | NMA                     | NA                  | NA                                                                  | NA       | NA                  | NA                    | 4082 (3) ††    |
| <i>(RALY)</i>      | rs4911379  | A vs C   | NMA                     | NA                  | NA                                                                  | NA       | NA                  | NA                    | 3898 (3) ††    |
| <i>(RALY)</i>      | rs6059592  | G vs T   | NMA                     | NA                  | NA                                                                  | NA       | NA                  | NA                    | 4247 (3) ††    |
| <i>(RALY)</i>      | rs2064348  | T vs C   | NMA                     | NA                  | NA                                                                  | NA       | NA                  | NA                    | 4031 (3) ††    |
| <i>RALY</i>        | rs2284378  | T vs C   | NMA                     | NA                  | NA                                                                  | NA       | NA                  | NA                    | 3994 (3) ††    |
| <i>RALY</i>        | rs6141443  | G vs C   | NMA                     | NA                  | NA                                                                  | NA       | NA                  | NA                    | 4039 (3) ††    |
| <i>RALY</i>        | rs13043392 | C vs A   | NMA                     | NA                  | NA                                                                  | NA       | NA                  | NA                    | 4015 (3) ††    |
| <i>RALY</i>        | rs2268089  | A vs G   | NMA                     | NA                  | NA                                                                  | NA       | NA                  | NA                    | 4062 (3) ††    |
| <i>(ASIP)</i>      | rs819163   | G vs T   | NMA                     | NA                  | NA                                                                  | NA       | NA                  | NA                    | 4079 (3) ††    |
| <i>(ASIP)</i>      | rs6059743  | A vs G   | NMA                     | NA                  | NA                                                                  | NA       | NA                  | NA                    | 3943 (3) ††    |
| <i>ASIP</i>        | rs819162   | T vs A   | NMA                     | NA                  | NA                                                                  | NA       | NA                  | NA                    | 4158 (3) ††    |
| <i>ASIP</i>        | rs6058017  | G vs A   | NMA                     | NA                  | NA                                                                  | NA       | NA                  | NA                    | 44247 (7)      |
| <i>ITCH</i>        | rs7266300  | T vs A   | NMA                     | NA                  | NA                                                                  | NA       | NA                  | NA                    | 3989 (3) ††    |
| <i>(MAP1LC3A)</i>  | rs6088519  | T vs C   | NMA                     | NA                  | NA                                                                  | NA       | NA                  | NA                    | 4101 (3) ††    |
| <i>(MAP1LC3A)</i>  | rs6088520  | T vs C   | NMA                     | NA                  | NA                                                                  | NA       | NA                  | NA                    | 4191 (3) ††    |
| <i>(MAP1LC3A)</i>  | rs2424994  | T vs C   | NMA                     | NA                  | NA                                                                  | NA       | NA                  | NA                    | 4075 (3) ††    |
| <i>PIGU</i>        | rs910873   | A vs G   | Gerstenblith, 2010 (43) | Intramural Research | Used a fixed-effect model, included                                 | 8388 (4) | 1.66 (1.49 to 1.83) | 2.5x10 <sup>-22</sup> | 6915 (4) ††,†† |

|                  |                     |             |                            |                                                  |                                                                                                                                                                                                                                                                  |           |                     |                       |              |
|------------------|---------------------|-------------|----------------------------|--------------------------------------------------|------------------------------------------------------------------------------------------------------------------------------------------------------------------------------------------------------------------------------------------------------------------|-----------|---------------------|-----------------------|--------------|
|                  |                     |             |                            | Program of<br>NIH, NCI                           | replication datasets<br>REP1 and REP2 of<br>Bishop, 2009 (15) as<br>one dataset, and did<br>not exclude<br>overlapping study<br>datasets between<br>Brown et al. 2008<br>(16) and Bishop et al.<br>2009 (15)                                                     |           |                     |                       |              |
| <i>PIGU</i>      | rs6142206           | T vs C      | NMA                        | NA                                               | NA                                                                                                                                                                                                                                                               | NA        | NA                  | NA                    | 3961 (3) ‡‡  |
| <i>TP53INP2</i>  | rs6060003           | C vs T      | NMA                        | NA                                               | NA                                                                                                                                                                                                                                                               | NA        | NA                  | NA                    | 4285 (3) ‡‡  |
| <i>NCOA6</i>     | rs959829            | G vs A      | NMA                        | NA                                               | NA                                                                                                                                                                                                                                                               | NA        | NA                  | NA                    | 4203 (3) ‡‡  |
| <i>NCOA6</i>     | rs4911442           | G vs A      | Gerstenblith, 2010<br>(43) | Intramural<br>Research<br>Program of<br>NIH, NCI | Included a family-<br>based study (49),<br>included replication<br>datasets REP1 and<br>REP2 of Bishop,<br>2009 (15) as one<br>dataset, and did not<br>exclude overlapping<br>study datasets<br>between Brown et al.<br>2008 (16) and Bishop<br>et al. 2009 (15) | 14222 (5) | 1.50 (1.32 to 1.71) | 5.5x10 <sup>-10</sup> | NA           |
| <i>NCOA6</i>     | rs7271289           | A vs G      | NMA                        | NA                                               | NA                                                                                                                                                                                                                                                               | NA        | NA                  | NA                    | 3983 (3) ‡‡  |
| <i>NCOA6</i>     | rs6088619           | C vs T      | NMA                        | NA                                               | NA                                                                                                                                                                                                                                                               | NA        | NA                  | NA                    | 3932 (3) ‡‡  |
| <i>MYH7B</i>     | rs1885120           | C vs G      | Gerstenblith, 2010<br>(43) | Intramural<br>Research<br>Program of<br>NIH, NCI | Used a fixed-effect<br>model, included<br>replication datasets<br>REP1 and REP2 of<br>Bishop et al. 2009<br>(15) as one dataset,<br>and did not exclude<br>overlapping study<br>datasets between<br>Brown et al. 2008<br>(16) and Bishop et al.<br>2009 (15)     | 8388 (4)  | 1.69 (1.52 to 1.82) | 1.5x10 <sup>-22</sup> | 6787 (4) ††  |
| <i>PHF20</i>     | rs6058339           | C vs T      | NMA                        | NA                                               | NA                                                                                                                                                                                                                                                               | NA        | NA                  | NA                    | 3957 (3)     |
| <i>LOC647979</i> | rs1204552           | A vs T      | NMA                        | NA                                               | NA                                                                                                                                                                                                                                                               | NA        | NA                  | NA                    | 4063 (3) ‡‡  |
| <i>ASIP</i>      | rs4911414-rs1015362 | (haplotype) | Gerstenblith, 2010<br>(43) | Intramural<br>Research<br>Program of<br>NIH, NCI | NP                                                                                                                                                                                                                                                               | 43293 (2) | NA                  | NA                    | NA           |
| <i>GSTT1</i>     | GSTT1*0             | *0 vs wt    | NMA                        | NA                                               | NA                                                                                                                                                                                                                                                               | NA        | NA                  | NA                    | 2824 (5)     |
| <i>PLA2G6</i>    | rs2284063           | G vs A      | Gerstenblith, 2010<br>(43) | Intramural<br>Research<br>Program of             | NP                                                                                                                                                                                                                                                               | 11689 (3) | 0.84 (0.76 to 0.94) | .003                  | 12690 (3) ‡‡ |

|               |           |        |                            |                                                                              |    |           |                     |      |              |
|---------------|-----------|--------|----------------------------|------------------------------------------------------------------------------|----|-----------|---------------------|------|--------------|
| <i>PLA2G6</i> | rs6001027 | G vs A | Gerstenblith, 2010<br>(43) | NIH, NCI<br>Intramural<br>Research<br>Program of<br>NIH, NCI<br>and Genetics | NP | 11689 (3) | 0.85 (0.78 to 0.93) | .001 | 12690 (3) ‡‡ |
|---------------|-----------|--------|----------------------------|------------------------------------------------------------------------------|----|-----------|---------------------|------|--------------|

† CI = confidence interval, NA = not applicable, NCI = National Cancer Institute, NIH = National Institutes of Health, NMA = data did not undergo meta-analyses, NP = not provided in original publication, OR = odds ratio, ScaRF = Skin Cancer Research Fund, UK = United Kingdom.

‡ In order to compare the MelGene results with those from previously published meta-analyses in the field, we collected all relevant articles published before July 31<sup>st</sup> 2010 and extracted the genetic contrasts and models used (allelic, dominant or recessive, random-effects or fixed-effects) from each publication when provided.

§ Meta-analysis was done by comparing the following genotype combinations: minor/minor versus major/major, minor/major versus major/major, minor/minor + minor/major versus major/major. Only the most statistically significant results are reported.

|| *P* values were not given in original publication and were approximated here for comparison purposes on the basis of the rounded odds ratios and/or confidence intervals provided in the original publication

# In addition to allelic models, the following genotype combinations were analyzed: minor/minor versus major/major, minor/major versus major/major. Only the allelic result is reported.

†† MelGene meta-analyses included one additional new study (52).

‡‡ Meta-analyses of 3 datasets only including genome-wide association studies (GWAS) and other large-scale replication studies. For the inclusion of data from GWAS and other large-scale studies where only odds ratios,



confidence intervals and/or  $P$  values were provided, we estimated genotype summary counts and the number of analyzed subjects on the basis of the reported data, control allele frequencies, and overall effective number of subjects. Therefore the listed number of subjects is only an approximation of the real number.

Supplementary Figure 1

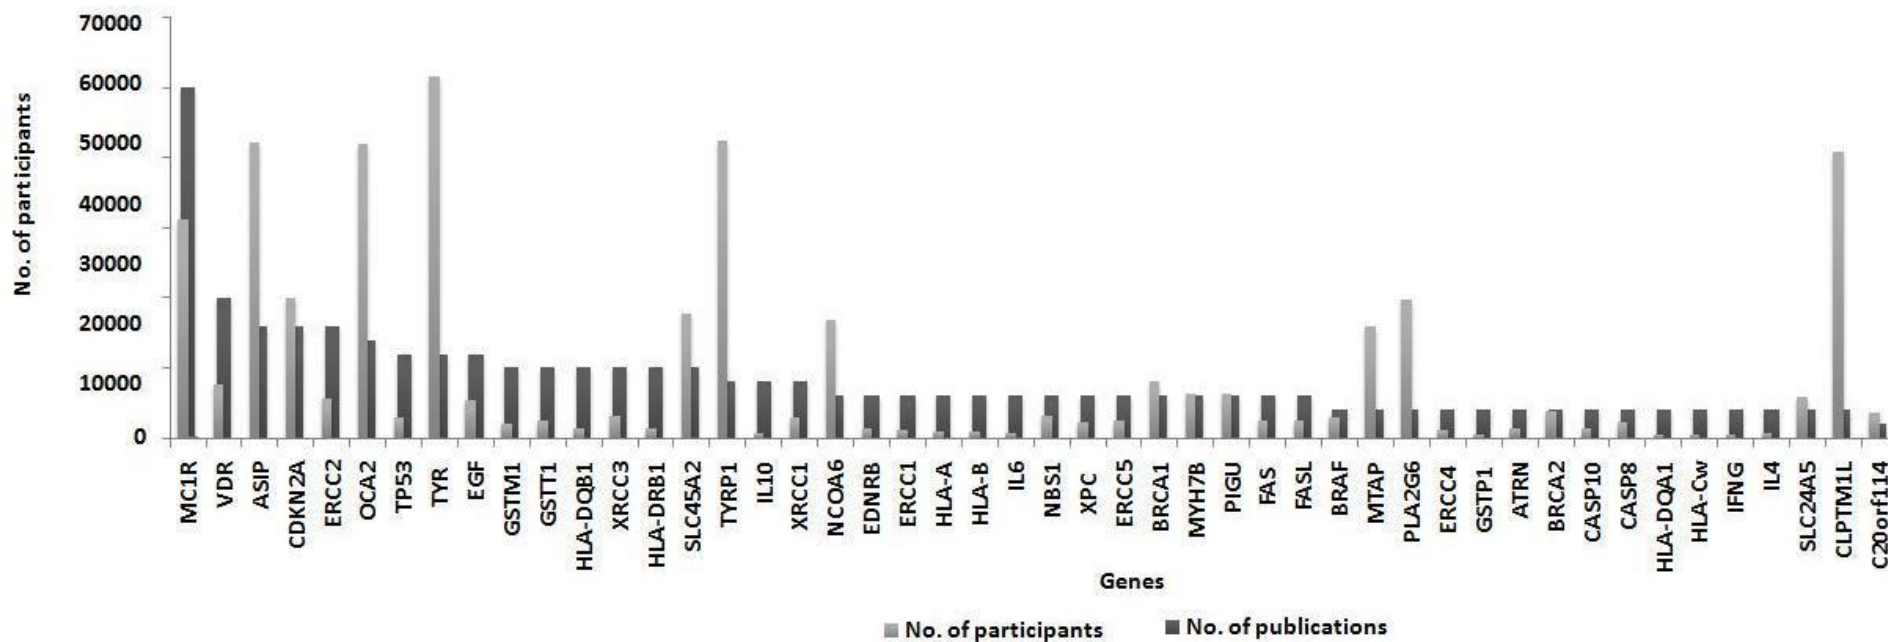

Supplementary Figure 1. The 50 most frequently studied genes in genetic association studies of cutaneous melanoma per aggregate number of study participants and number of publications per gene including genome-wide association studies.

Supplementary Figure 2

A

ASIP (rs6058017): G vs A

|                                 | OR          | 95% CI                | I <sup>2</sup> |
|---------------------------------|-------------|-----------------------|----------------|
| <b>All studies</b>              | <b>0.89</b> | <b>(0.81 to 0.99)</b> | <b>0</b>       |
| <b>All excl initial</b>         | <b>0.89</b> | <b>(0.80 to 0.99)</b> | <b>2</b>       |
| <b>All excl HWE violations</b>  | <b>0.90</b> | <b>(0.82 to 1.00)</b> | <b>0</b>       |
| <b>Study specific ORs</b>       |             |                       |                |
| Nan, 2009 (C)                   | 0.90        | (0.65 to 1.25)        |                |
| Brudnik, 2009 (C)               | 0.64        | (0.38 to 1.07)        |                |
| Gudbjartsson, 2008, Spain (C)   | 0.82        | (0.61 to 1.08)        |                |
| Gudbjartsson, 2008, Iceland (C) | 0.99        | (0.83 to 1.18)        |                |
| Gudbjartsson, 2008, Sweden (C)  | 0.89        | (0.76 to 1.05)        |                |
| Meziani, 2005 (C) #             | 0.59        | (0.31 to 1.10)        |                |
| Landi, 2005 (C) †               | –           | –                     |                |
| Kanetsky, 2002 (C) •            | 0.95        | (0.63 to 1.43)        |                |

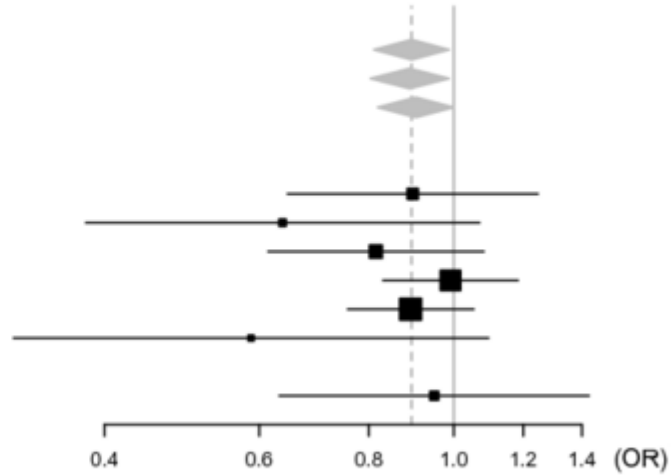

B

CDKN2A (rs11515): G vs C

|                           | OR   | 95% CI         | I <sup>2</sup> |
|---------------------------|------|----------------|----------------|
| All studies               | 1.15 | (1.01 to 1.32) | 0              |
| All excl initial          | 1.13 | (0.98 to 1.31) | 0              |
| <b>Study specific ORs</b> |      |                |                |
| Goldstein, 2008 (C)       | 1.08 | (0.89 to 1.32) |                |
| Pjanova, 2007 (C)         | 1.07 | (0.62 to 1.86) |                |
| Debniak, 2005 (C)         | 1.21 | (0.96 to 1.52) |                |
| Kumar, 2001 (C) •         | 1.34 | (0.91 to 1.96) |                |

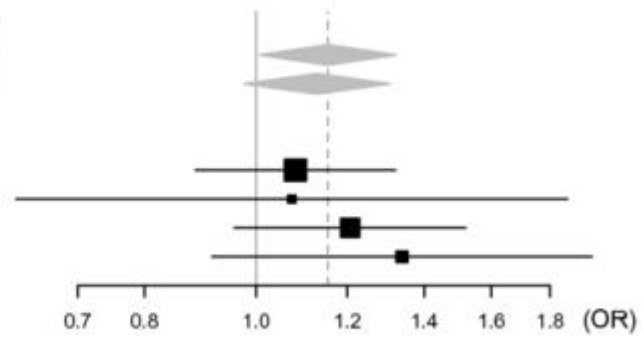

C

**CDKN2A (rs3088440): T vs C**

|                                | OR          | 95% CI                | I <sup>2</sup> |
|--------------------------------|-------------|-----------------------|----------------|
| <b>All studies</b>             | <b>1.25</b> | <b>(1.03 to 1.51)</b> | <b>24</b>      |
| <b>All excl initial</b>        | <b>1.15</b> | <b>(0.97 to 1.37)</b> | <b>0</b>       |
| <b>All excl HWE violations</b> | <b>1.15</b> | <b>(0.97 to 1.37)</b> | <b>0</b>       |

**Study specific ORs**

|                     |      |                |
|---------------------|------|----------------|
| Goldstein, 2008 (C) | 1.11 | (0.88 to 1.40) |
| Pjanova, 2007 (C)   | 1.50 | (0.85 to 2.64) |
| Debniak, 2005 (C)   | 1.14 | (0.85 to 1.53) |
| Kumar, 2001 (C) • # | 1.71 | (1.13 to 2.61) |

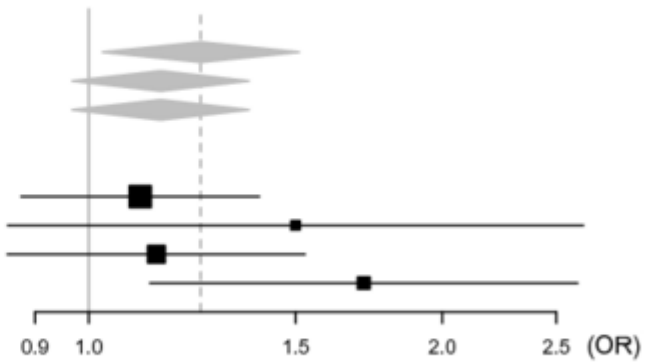

D

MC1R (R213W): T vs C

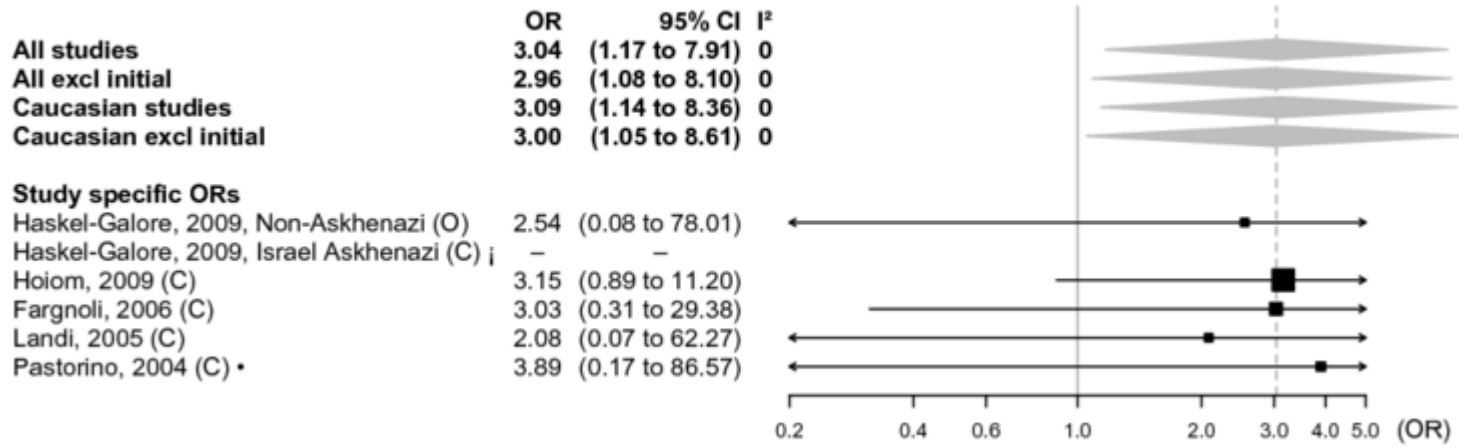

E

**MC1R (rs11547464): A vs G**

|                               | <b>OR</b>   | <b>95% CI</b>         | <b>I<sup>2</sup></b> |
|-------------------------------|-------------|-----------------------|----------------------|
| <b>All studies</b>            | <b>1.67</b> | <b>(1.26 to 2.21)</b> | <b>7</b>             |
| <b>All excl initial</b>       | <b>1.68</b> | <b>(1.24 to 2.27)</b> | <b>14</b>            |
| <b>Caucasian studies</b>      | <b>1.67</b> | <b>(1.23 to 2.25)</b> | <b>14</b>            |
| <b>Caucasian excl initial</b> | <b>1.67</b> | <b>(1.21 to 2.31)</b> | <b>20</b>            |

**Study specific ORs**

|                                           |      |                  |
|-------------------------------------------|------|------------------|
| Kanetsky, 2010 (C)                        | 0.51 | (0.21 to 1.23)   |
| Duffy, 2009 (C) †                         | –    | –                |
| Scherer, 2009, Germany (C)                | 1.95 | (1.05 to 3.62)   |
| Scherer, 2009, Spain (C)                  | 1.93 | (0.95 to 3.92)   |
| Council, 2009 (C)                         | 0.91 | (0.22 to 3.86)   |
| Haskel-Galore, 2009, Non-Askhenazi (O)    | 1.91 | (0.30 to 12.10)  |
| Haskel-Galore, 2009, Israel Askhenazi (C) | 3.04 | (1.02 to 9.01)   |
| Hoiom, 2009 (C)                           | 3.15 | (0.89 to 11.20)  |
| Brudnik, 2009 (C)                         | 6.94 | (0.35 to 139.41) |
| Guedj, 2008 (C)                           | 1.66 | (0.88 to 3.13)   |
| Fernandez, 2007 (C)                       | 0.60 | (0.16 to 2.29)   |
| Mossner, 2007 (C)                         | 1.73 | (0.56 to 5.33)   |
| Stratigos, 2006 (C)                       | 4.42 | (0.91 to 21.49)  |
| Fargnoli, 2006 (C)                        | 1.35 | (0.46 to 3.96)   |
| Landi, 2005 (C)                           | 3.15 | (0.63 to 15.71)  |
| Matichard, 2004 (C)                       | 5.93 | (0.30 to 119.10) |
| Kennedy, 2001 (C) •                       | 1.57 | (0.39 to 6.33)   |

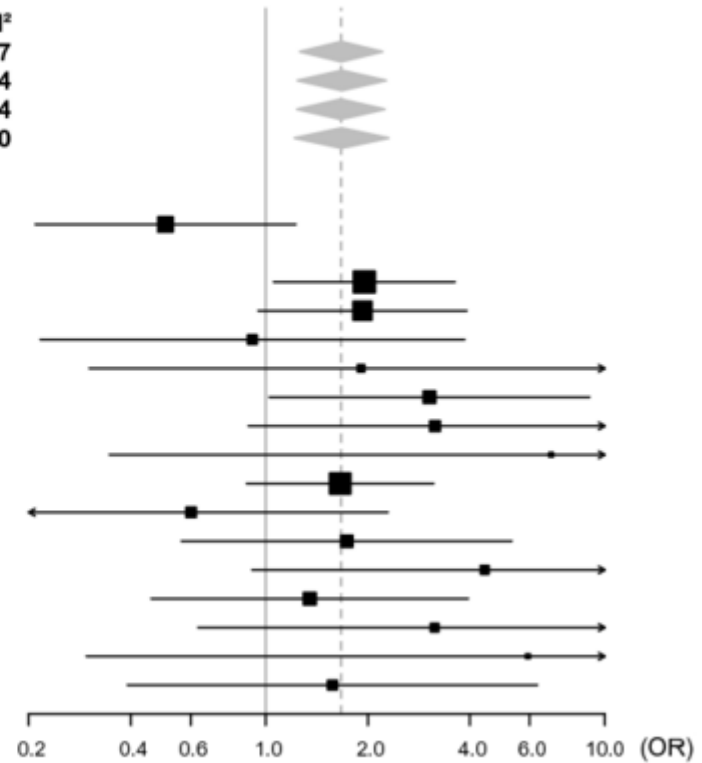

F

**MC1R (rs1805005): T vs G**

|                                           | OR          | 95% CI                | I <sup>2</sup> |
|-------------------------------------------|-------------|-----------------------|----------------|
| <b>All studies ø</b>                      | <b>1.13</b> | <b>(1.02 to 1.26)</b> | <b>56</b>      |
| <b>Caucasian studies</b>                  | <b>1.13</b> | <b>(1.01 to 1.26)</b> | <b>58</b>      |
| <b>Study specific ORs</b>                 |             |                       |                |
| Kanetsky, 2010 (C)                        | 0.99        | (0.76 to 1.28)        |                |
| Duffy, 2009 (C) †                         | -           | -                     |                |
| Scherer, 2009, Germany (C)                | 0.99        | (0.78 to 1.26)        |                |
| Scherer, 2009, Spain (C)                  | 1.25        | (1.01 to 1.55)        |                |
| Council, 2009 (C)                         | 1.15        | (0.72 to 1.83)        |                |
| Haskel-Galore, 2009, Non-Askhenazi (O)    | 1.71        | (0.62 to 4.74)        |                |
| Haskel-Galore, 2009, Israel Askhenazi (C) | 0.84        | (0.58 to 1.21)        |                |
| Hoiom, 2009 (C)                           | 1.25        | (0.94 to 1.64)        |                |
| Brudnik, 2009 (C)                         | 1.04        | (0.56 to 1.94)        |                |
| Gudbjartsson, 2008, Sweden (C)            | 1.10        | (0.91 to 1.32)        |                |
| Gudbjartsson, 2008, Iceland (C)           | 1.07        | (0.90 to 1.27)        |                |
| Gudbjartsson, 2008, Spain (C)             | 1.33        | (1.04 to 1.70)        |                |
| Fernandez, 2007 (C)                       | 1.61        | (1.04 to 2.50)        |                |
| Mossner, 2007 (C)                         | 0.90        | (0.64 to 1.26)        |                |
| Debniak, 2006 (C)                         | 1.35        | (1.10 to 1.65)        |                |
| Han, 2006 (C)                             | 1.05        | (0.77 to 1.43)        |                |
| Stratigos, 2006 (C)                       | 2.11        | (1.32 to 3.36)        |                |
| Fargnoli, 2006 (C)                        | 0.56        | (0.34 to 0.92)        |                |
| Landi, 2005 (C)                           | 1.19        | (0.79 to 1.77)        |                |
| Dwyer, 2004 (C)                           | 0.58        | (0.35 to 0.95)        |                |
| Matichard, 2004 (C)                       | 2.80        | (1.46 to 5.36)        |                |
| Kennedy, 2001 (C)                         | 1.21        | (0.74 to 1.99)        |                |
| Palmer, 2000 (C) • †                      | -           | -                     |                |

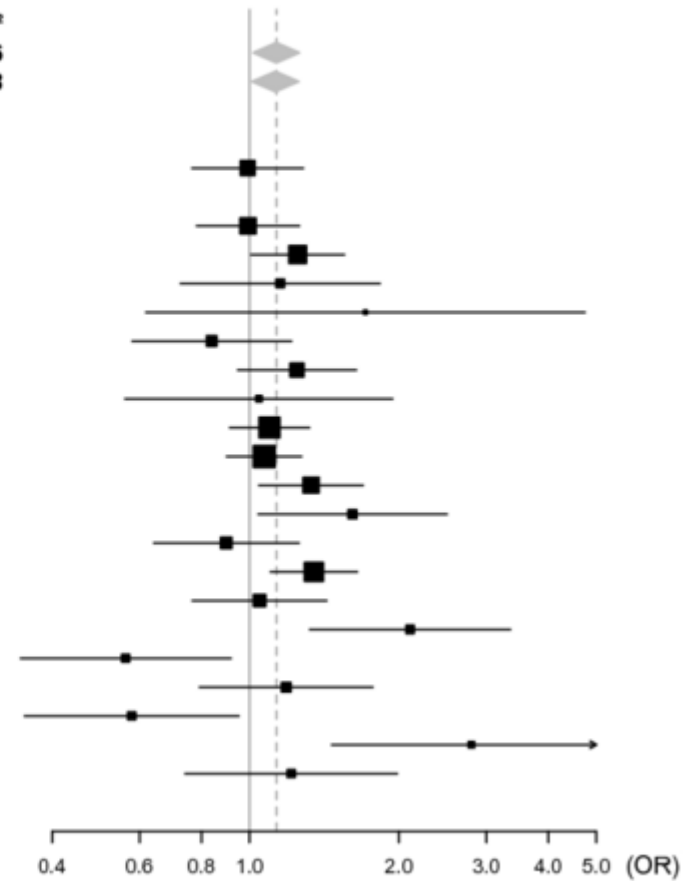



G

**MC1R (rs1805006): A vs C**

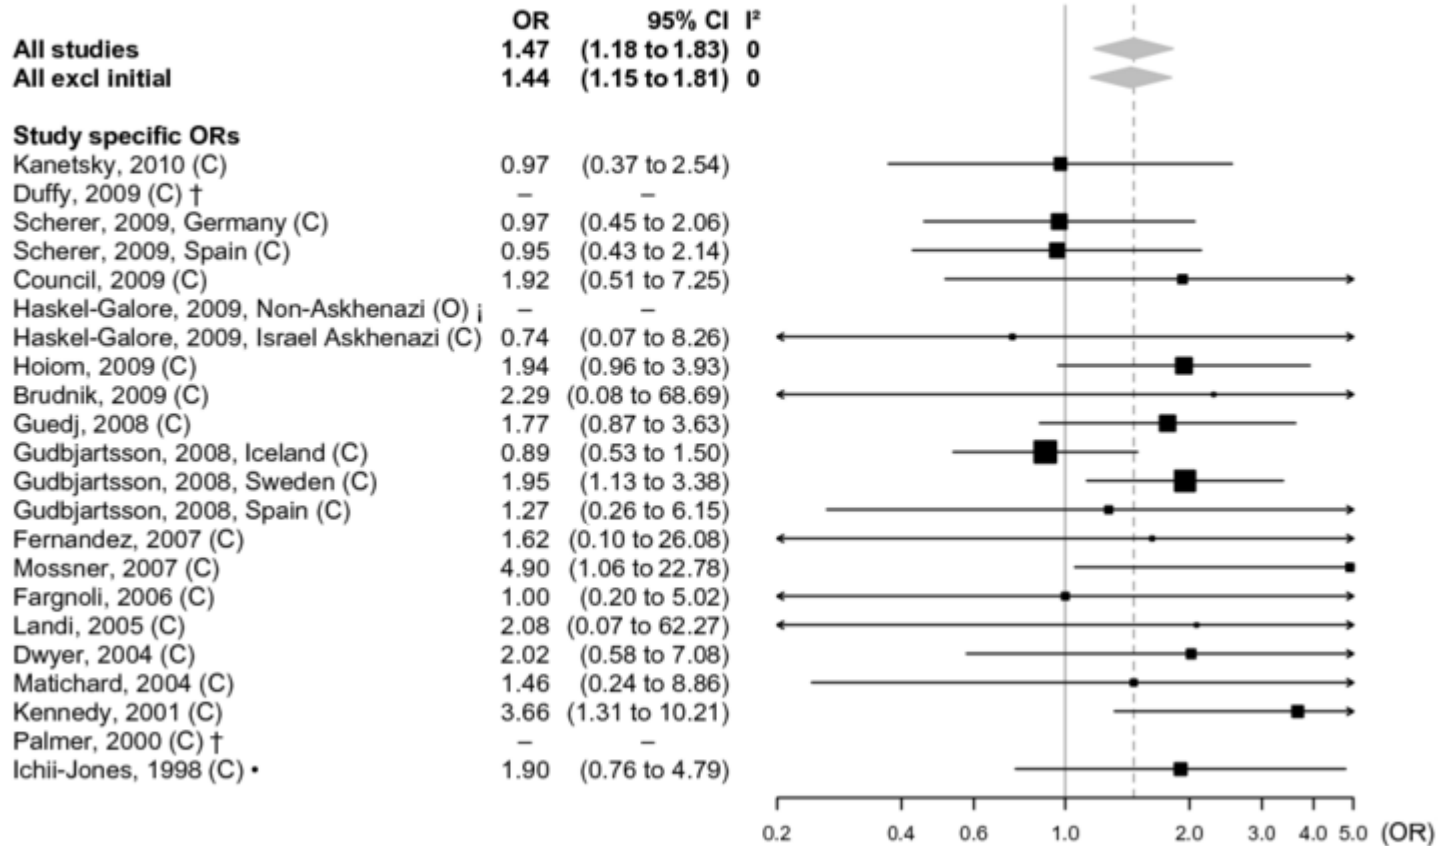

H

MC1R (rs1805007): T vs C

|                                           | OR          | 95% CI                | I <sup>2</sup> |
|-------------------------------------------|-------------|-----------------------|----------------|
| <b>All studies ø</b>                      | <b>1.83</b> | <b>(1.56 to 2.15)</b> | <b>69</b>      |
| <b>All excl HWE violations</b>            | <b>1.82</b> | <b>(1.55 to 2.15)</b> | <b>71</b>      |
| <b>Study specific ORs</b>                 |             |                       |                |
| Kanetsky, 2010 (C)                        | 1.96        | (1.34 to 2.86)        |                |
| Duffy, 2009 (C) †                         | –           | –                     |                |
| Scherer, 2009, Spain (C)                  | 2.70        | (1.65 to 4.44)        |                |
| Scherer, 2009, Germany (C)                | 1.73        | (1.32 to 2.27)        |                |
| Council, 2009 (C)                         | 0.94        | (0.51 to 1.74)        |                |
| Haskel-Galore, 2009, Non-Askhenazi (O) j  | –           | –                     |                |
| Haskel-Galore, 2009, Israel Askhenazi (C) | 2.88        | (1.50 to 5.56)        |                |
| Hoiom, 2009 (C)                           | 1.76        | (1.38 to 2.25)        |                |
| Brudnik, 2009 (C)                         | 0.81        | (0.42 to 1.59)        |                |
| Guedj, 2008 (C)                           | 2.18        | (1.67 to 2.86)        |                |
| Gudbjartsson, 2008, Spain (C)             | 2.65        | (1.63 to 4.30)        |                |
| Gudbjartsson, 2008, Iceland (C)           | 1.11        | (0.93 to 1.32)        |                |
| Gudbjartsson, 2008, Sweden (C)            | 2.32        | (1.74 to 3.10)        |                |
| Fernandez, 2007 (C)                       | 1.46        | (0.55 to 3.83)        |                |
| Mossner, 2007 (C)                         | 1.60        | (1.09 to 2.33)        |                |
| Debniak, 2006 (C)                         | 1.88        | (1.50 to 2.36)        |                |
| Han, 2006 (C)                             | 2.06        | (1.47 to 2.88)        |                |
| Stratigos, 2006 (C) #                     | 2.32        | (0.85 to 6.38)        |                |
| Fargnoli, 2006 (C)                        | 3.16        | (1.13 to 8.87)        |                |
| Landi, 2005 (C)                           | 3.05        | (1.68 to 5.54)        |                |
| Dwyer, 2004 (C)                           | 0.93        | (0.56 to 1.55)        |                |
| Matichard, 2004 (C)                       | 4.68        | (1.56 to 14.08)       |                |
| Kennedy, 2001 (C)                         | 1.75        | (1.00 to 3.08)        |                |
| Palmer, 2000 (C) • †                      | –           | –                     |                |

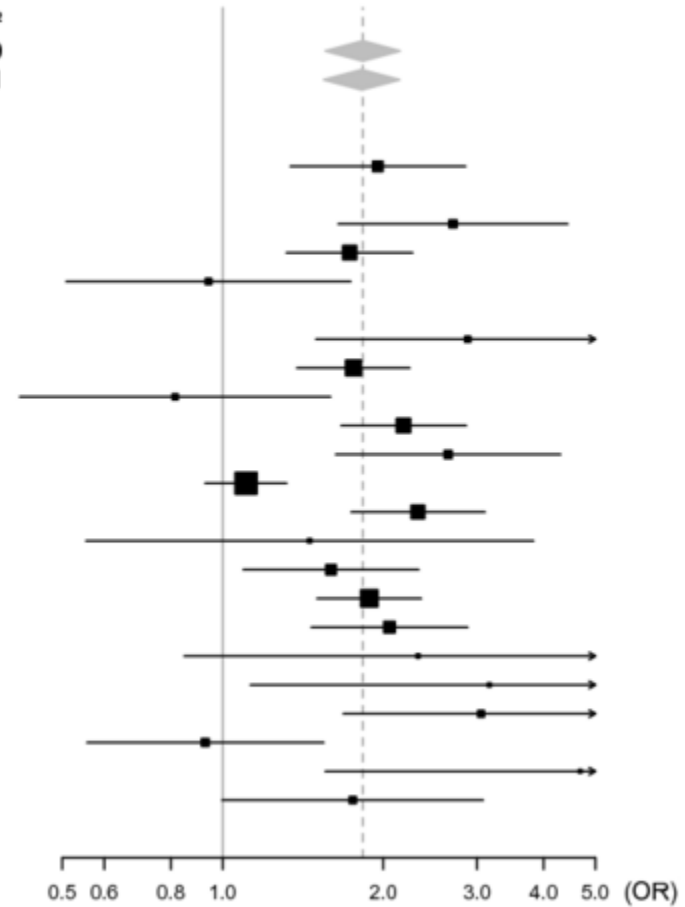

I

**MC1R (rs1805008): T vs C**

|                                           | OR          | 95% CI                | I <sup>2</sup> |
|-------------------------------------------|-------------|-----------------------|----------------|
| <b>All studies ø</b>                      | <b>1.54</b> | <b>(1.33 to 1.79)</b> | <b>67</b>      |
| <b>Caucasian studies</b>                  | <b>1.53</b> | <b>(1.32 to 1.78)</b> | <b>67</b>      |
| <b>Study specific ORs</b>                 |             |                       |                |
| Kanetsky, 2010 (C)                        | 1.44        | (1.02 to 2.04)        |                |
| Duffy, 2009 (C) †                         | -           | -                     |                |
| Scherer, 2009, Spain (C)                  | 3.08        | (1.57 to 6.01)        |                |
| Scherer, 2009, Germany (C)                | 1.73        | (1.32 to 2.27)        |                |
| Council, 2009 (C)                         | 2.27        | (1.26 to 4.10)        |                |
| Haskel-Galore, 2009, Non-Askhenazi (O)    | 11.12       | (0.57 to 217.91)      |                |
| Haskel-Galore, 2009, Israel Askhenazi (C) | 1.50        | (0.68 to 3.31)        |                |
| Hoiom, 2009 (C)                           | 1.69        | (1.35 to 2.10)        |                |
| Brudnik, 2009 (C)                         | 0.98        | (0.58 to 1.64)        |                |
| Guedj, 2008 (C)                           | 1.76        | (1.31 to 2.36)        |                |
| Gudbjartsson, 2008, Spain (C)             | 1.88        | (1.10 to 3.21)        |                |
| Gudbjartsson, 2008, Iceland (C)           | 0.87        | (0.74 to 1.04)        |                |
| Gudbjartsson, 2008, Sweden (C)            | 1.70        | (1.44 to 2.00)        |                |
| Fernandez, 2007 (C)                       | 5.82        | (1.20 to 28.25)       |                |
| Mossner, 2007 (C)                         | 1.32        | (0.91 to 1.90)        |                |
| Debniak, 2006 (C)                         | 1.30        | (1.06 to 1.58)        |                |
| Han, 2006 (C)                             | 1.26        | (0.88 to 1.81)        |                |
| Stratigos, 2006 (C)                       | 2.08        | (0.49 to 8.80)        |                |
| Fagnoli, 2006 (C)                         | 1.52        | (0.53 to 4.36)        |                |
| Landi, 2005 (C)                           | 1.04        | (0.41 to 2.65)        |                |
| Dwyer, 2004 (C)                           | 1.83        | (1.11 to 3.02)        |                |
| Matichard, 2004 (C)                       | 3.28        | (1.18 to 9.12)        |                |
| Kennedy, 2001 (C)                         | 1.46        | (0.96 to 2.22)        |                |
| Palmer, 2000 (C) • †                      | -           | -                     |                |

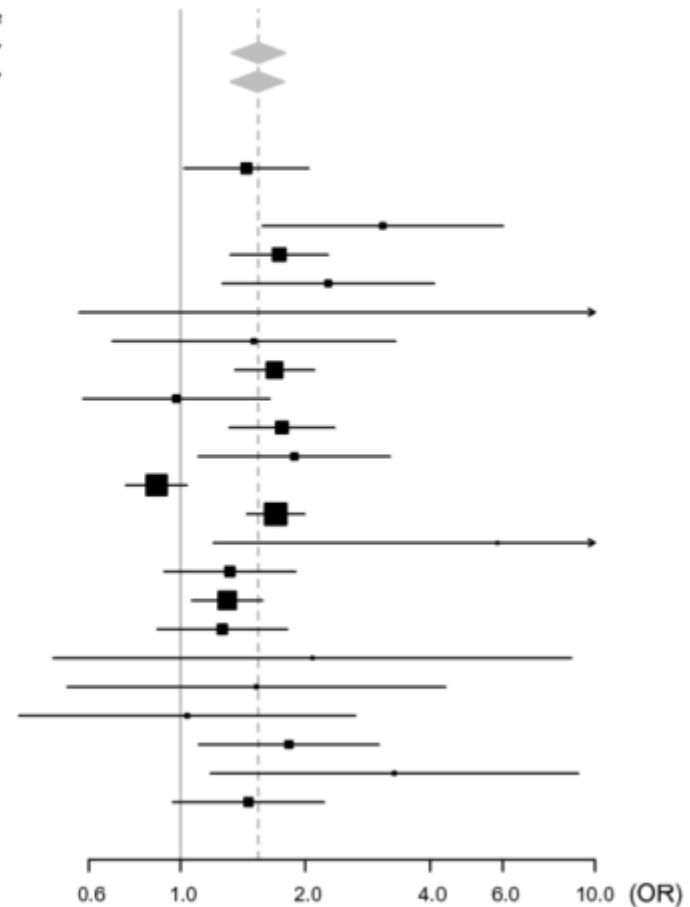

J

**MC1R (rs1805009): C vs G**

|                                           | OR          | 95% CI                | I <sup>2</sup> |
|-------------------------------------------|-------------|-----------------------|----------------|
| <b>All studies</b>                        | <b>1.89</b> | <b>(1.51 to 2.38)</b> | <b>42</b>      |
| <b>All excl initial</b>                   | <b>1.96</b> | <b>(1.55 to 2.47)</b> | <b>42</b>      |
| <b>Study specific ORs</b>                 |             |                       |                |
| Kanetsky, 2010 (C)                        | 2.43        | (1.23 to 4.79)        |                |
| Duffy, 2009 (C) †                         | –           | –                     |                |
| Scherer, 2009, Germany (C)                | 1.95        | (1.05 to 3.62)        |                |
| Scherer, 2009, Spain (C)                  | 2.70        | (1.65 to 4.44)        |                |
| Council, 2009 (C)                         | 5.47        | (1.13 to 26.60)       |                |
| Haskel-Galore, 2009, Israel Askhenazi (C) | 2.96        | (0.10 to 88.72)       |                |
| Haskel-Galore, 2009, Non-Askhenazi (O) †  | –           | –                     |                |
| Hoiom, 2009 (C)                           | 1.93        | (0.89 to 4.21)        |                |
| Brudnik, 2009 (C)                         | 0.57        | (0.10 to 3.12)        |                |
| Guedj, 2008 (C)                           | 2.32        | (1.56 to 3.43)        |                |
| Gudbjartsson, 2008, Iceland (C)           | 0.99        | (0.65 to 1.50)        |                |
| Gudbjartsson, 2008, Sweden (C)            | 2.11        | (1.33 to 3.33)        |                |
| Gudbjartsson, 2008, Spain (C)             | 2.55        | (1.47 to 4.41)        |                |
| Fernandez, 2007 (C)                       | 3.96        | (1.50 to 10.46)       |                |
| Mossner, 2007 (C)                         | 1.41        | (0.62 to 3.25)        |                |
| Han, 2006 (C)                             | 2.40        | (1.28 to 4.50)        |                |
| Fagnoli, 2006 (C)                         | 12.40       | (0.69 to 223.55)      |                |
| Landi, 2005 (C)                           | 1.93        | (0.71 to 5.28)        |                |
| Dwyer, 2004 (C)                           | 0.46        | (0.17 to 1.23)        |                |
| Matichard, 2004 (C)                       | 2.65        | (0.69 to 10.14)       |                |
| Kennedy, 2001 (C)                         | 1.25        | (0.24 to 6.51)        |                |
| Palmer, 2000 (C) †                        | –           | –                     |                |
| Ichii-Jones, 1998 (C) •                   | 1.15        | (0.58 to 2.29)        |                |

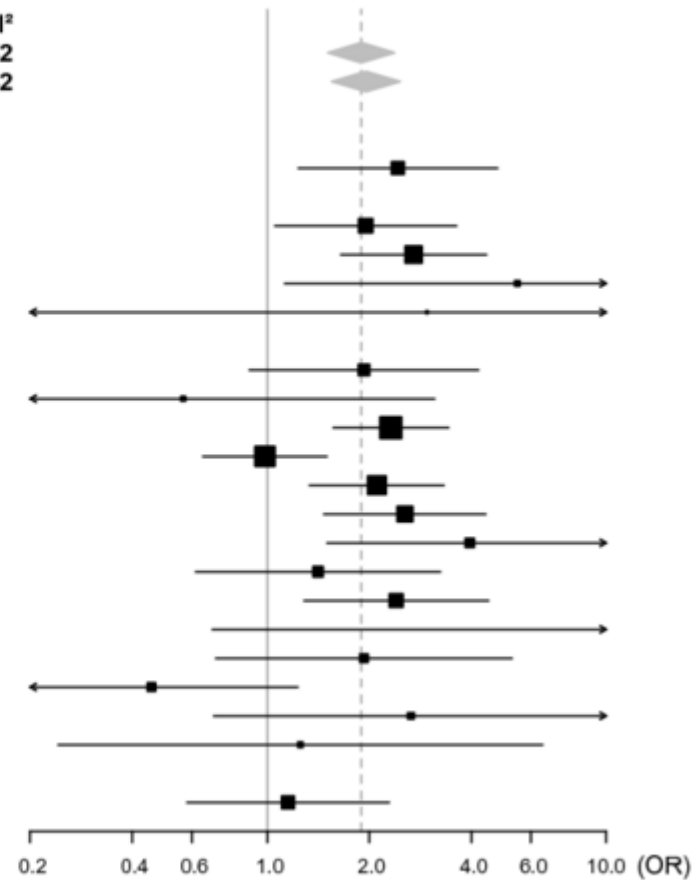

K

**SLC45A2 (rs16891982): C vs G**

|                         | OR          | 95% CI                | I <sup>2</sup> |
|-------------------------|-------------|-----------------------|----------------|
| <b>All studies</b>      | <b>0.40</b> | <b>(0.33 to 0.47)</b> | <b>29</b>      |
| <b>All excl initial</b> | <b>0.40</b> | <b>(0.33 to 0.48)</b> | <b>38</b>      |

**Study specific ORs**

|                           |      |                |  |
|---------------------------|------|----------------|--|
| Duffy, 2009 (C) †         | –    | –              |  |
| Stacey, 2009, Iceland (C) | 0.64 | (0.36 to 1.15) |  |
| Stacey, 2009, Holland (C) | 0.39 | (0.23 to 0.68) |  |
| Stacey, 2009, Sweden (C)  | 0.26 | (0.16 to 0.43) |  |
| Stacey, 2009, Austria (C) | 0.43 | (0.17 to 1.13) |  |
| Stacey, 2009, Italy (C)   | 0.49 | (0.34 to 0.70) |  |
| Stacey, 2009, Spain (C)   | 0.33 | (0.27 to 0.42) |  |
| Nan, 2009 (C)             | 0.67 | (0.34 to 1.31) |  |
| Guedj, 2008 (C)           | 0.36 | (0.28 to 0.47) |  |
| Fernandez, 2008 (C) •     | 0.40 | (0.23 to 0.69) |  |

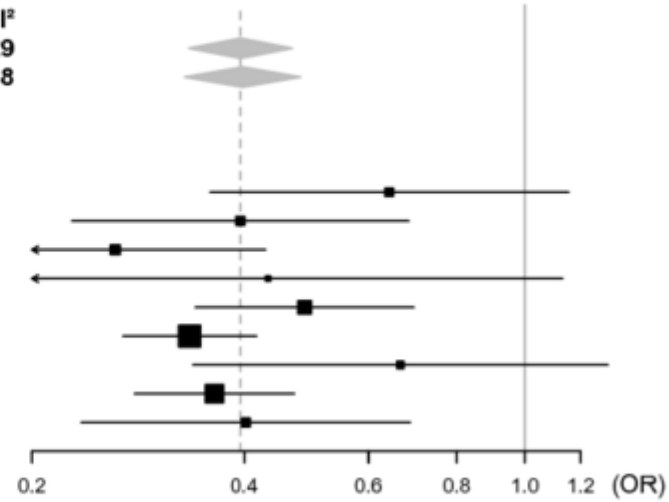

L

**TYR (rs1126809): A vs G**

|                                   | OR          | 95% CI                | I <sup>2</sup> |
|-----------------------------------|-------------|-----------------------|----------------|
| <b>All studies</b>                | <b>1.22</b> | <b>(1.14 to 1.31)</b> | <b>29</b>      |
| <b>All excl initial</b>           | <b>1.25</b> | <b>(1.12 to 1.40)</b> | <b>21</b>      |
| <b>Study specific ORs</b>         |             |                       |                |
| Duffy, 2009 (C) †                 | –           | –                     |                |
| Bishop, 2009, GenoMEL REP1 (C) ¶¶ | 1.34        | (1.17 to 1.54)        |                |
| Bishop, 2009, Leeds REP2 (C) ¶¶   | 1.22        | (1.06 to 1.40)        |                |
| Fernandez, 2008 (C)               | 1.01        | (0.72 to 1.43)        |                |
| Gudbjartsson, 2008, Spain (C) •   | 1.15        | (0.93 to 1.41)        |                |
| Gudbjartsson, 2008, Iceland (C) • | 1.13        | (1.02 to 1.26)        |                |
| Gudbjartsson, 2008, Sweden (C) •  | 1.32        | (1.18 to 1.48)        |                |

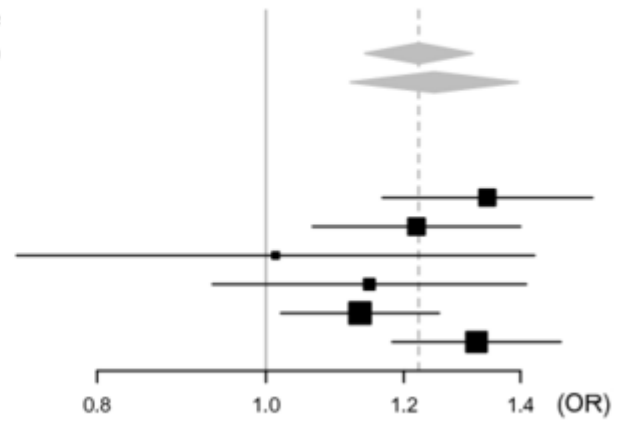

M

TYR (rs1042602): A vs C

|                                   | OR          | 95% CI                | I <sup>2</sup> |
|-----------------------------------|-------------|-----------------------|----------------|
| <b>All studies</b>                | <b>0.95</b> | <b>(0.90 to 0.99)</b> | <b>0</b>       |
| <b>All excl initial</b>           | <b>0.94</b> | <b>(0.89 to 1.00)</b> | <b>0</b>       |
| <b>Study specific ORs</b>         |             |                       |                |
| Duffy, 2009 (C) †                 | –           | –                     | –              |
| Bishop, 2009, GenoMEL REP1 (C) †† | 0.89        | (0.78 to 1.02)        |                |
| Bishop, 2009, Leeds REP2 (C) ††   | 0.93        | (0.82 to 1.06)        |                |
| Bishop, 2009, GenoMEL GWAS (C) †† | 0.93        | (0.85 to 1.02)        |                |
| Nan, 2009 (C)                     | 1.17        | (0.94 to 1.46)        |                |
| Council, 2009 (C)                 | 1.03        | (0.77 to 1.37)        |                |
| Fernandez, 2008 (C)               | 0.97        | (0.72 to 1.31)        |                |
| Gudbjartsson, 2008, Spain (C) •   | 0.93        | (0.77 to 1.13)        |                |
| Gudbjartsson, 2008, Iceland (C) • | 0.90        | (0.81 to 1.01)        |                |
| Gudbjartsson, 2008, Sweden (C) •  | 1.01        | (0.90 to 1.13)        |                |

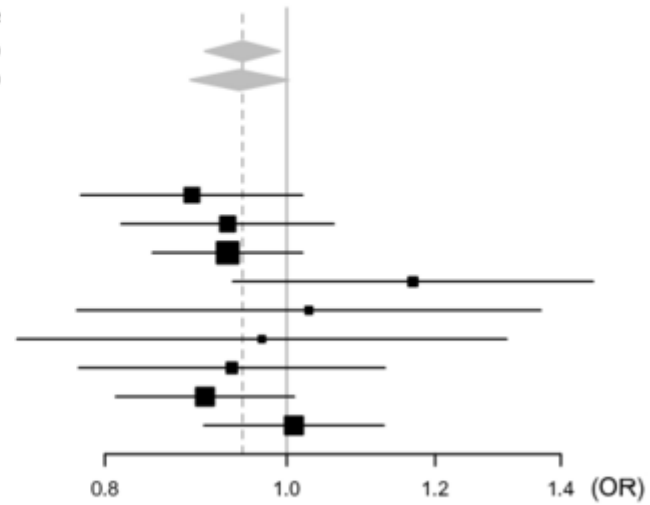

N

**TYR (rs1393350): A vs G**

|                                                 | <b>OR</b>   | <b>95% CI</b>         | <b>I<sup>2</sup></b> |
|-------------------------------------------------|-------------|-----------------------|----------------------|
| <b>All studies</b>                              | <b>1.27</b> | <b>(1.16 to 1.39)</b> | <b>35</b>            |
| <b>All excl initial</b>                         | <b>1.30</b> | <b>(1.21 to 1.39)</b> | <b>0</b>             |
| <b>Study specific ORs</b>                       |             |                       |                      |
| Bishop, 2009 [Replication GenoMEL (REP1)] (C) ¶ | 1.40        | (1.21 to 1.62)        |                      |
| Bishop, 2009 [Replication Leeds (REP2)] (C) ¶   | 1.22        | (1.06 to 1.40)        |                      |
| Bishop, 2009 [GWAS] (C) ¶                       | 1.30        | (1.18 to 1.43)        |                      |
| Nan, 2009 (C) •                                 | 1.06        | (0.84 to 1.33)        |                      |

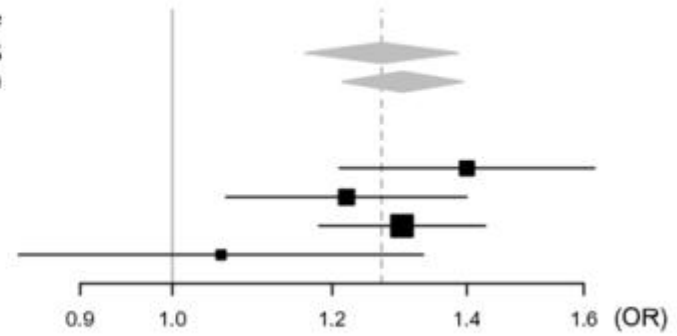



O

**TYRP1 (rs1408799): T vs C**

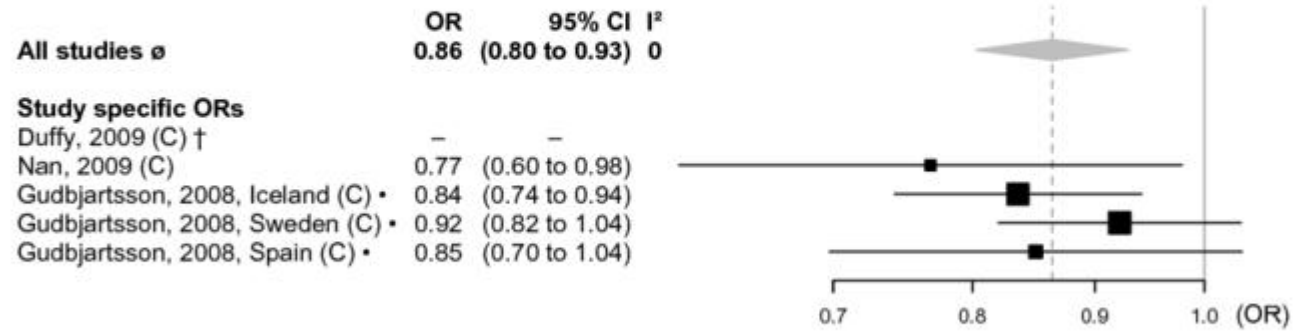

P

VDR (rs1544410): A vs G

|                                           | OR   | 95% CI         | I <sup>2</sup> |
|-------------------------------------------|------|----------------|----------------|
| All studies                               | 0.89 | (0.82 to 0.97) | 24             |
| All excl initial                          | 0.88 | (0.80 to 0.98) | 39             |
| <b>Study specific ORs</b>                 |      |                |                |
| Gapska, 2009 (C)                          | 0.94 | (0.83 to 1.07) |                |
| Randerson-Moor, 2009, UK (Leeds CCS2) (C) | 0.83 | (0.68 to 1.02) |                |
| Randerson-Moor, 2009, UK (Leeds CCS1) (C) | 0.99 | (0.84 to 1.16) |                |
| Li, 2008 (C)                              | 0.86 | (0.75 to 0.99) |                |
| Santonocito, 2007 (C)                     | 0.60 | (0.40 to 0.90) |                |
| Han, 2007 (C) •                           | 0.89 | (0.72 to 1.12) |                |

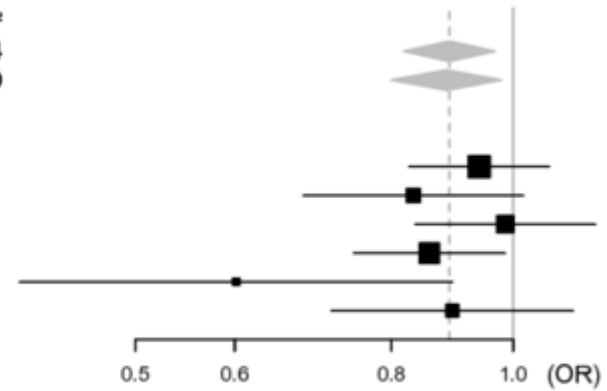

Q

CLPTM1L (rs401681): T vs C

|                           | OR          | 95% CI                | I <sup>2</sup> |
|---------------------------|-------------|-----------------------|----------------|
| <b>All studies ø</b>      | <b>1.15</b> | <b>(1.08 to 1.22)</b> | <b>27</b>      |
| <b>Study specific ORs</b> |             |                       |                |
| Pooley, 2010 (C) ¶¶       | 0.99        | (0.84 to 1.17)        |                |
| Stacey, 2009, Iceland (C) | 1.13        | (1.00 to 1.26)        |                |
| Stacey, 2009, Sweden (C)  | 1.22        | (1.10 to 1.35)        |                |
| Stacey, 2009, Spain (C)   | 1.13        | (1.00 to 1.28)        |                |
| Stacey, 2009, Holland (C) | 1.17        | (1.04 to 1.32)        |                |
| Stacey, 2009, Austria (C) | 0.99        | (0.76 to 1.29)        |                |
| Stacey, 2009, Italy (C)   | 1.33        | (1.11 to 1.61)        |                |
| Rafnar, 2009 (C) • ‡      | -           | -                     |                |
| Rafnar, 2009 (C) • ‡      | -           | -                     |                |
| Rafnar, 2009 (C) • ‡      | -           | -                     |                |

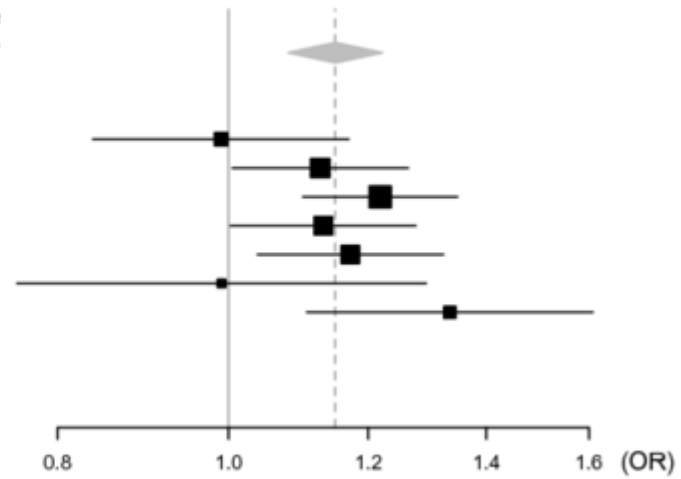

R

**MYH7B (rs1885120): C vs G**

|                                                 | <b>OR</b>   | <b>95% CI</b>         | <b>I<sup>2</sup></b> |
|-------------------------------------------------|-------------|-----------------------|----------------------|
| <b>All studies</b> $\emptyset$                  | <b>1.59</b> | <b>(1.41 to 1.79)</b> | <b>0</b>             |
| <b>Study specific ORs</b>                       |             |                       |                      |
| Debniak, 2010 (C)                               | 1.47        | (1.14 to 1.88)        |                      |
| Bishop, 2009 [Replication GenoMEL (REP1)] (C) ¶ | 1.55        | (1.22 to 1.97)        |                      |
| Bishop, 2009 [Replication Leeds (REP2)] (C) ¶¶  | 1.61        | (1.30 to 1.99)        |                      |
| Bishop, 2009 [GWAS] (C) †                       | –           | –                     |                      |
| Brown,2008 [GWAS] (C) ‡                         | –           | –                     |                      |
| Brown, 2008 [Q2-Replication] (C)                | 1.72        | (1.36 to 2.18)        |                      |
| Brown, 2008 [A1-Replication] (C) • ‡            | –           | –                     |                      |

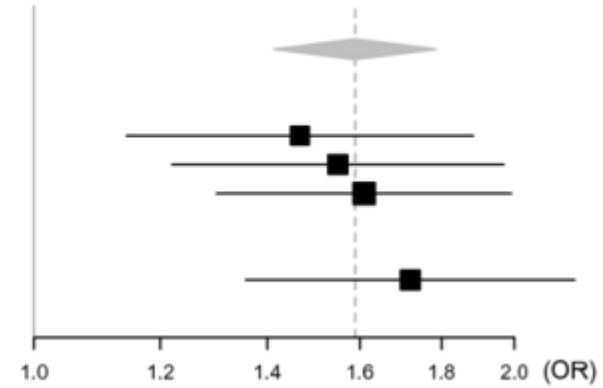

S

**FIGU (rs910873): A vs G**

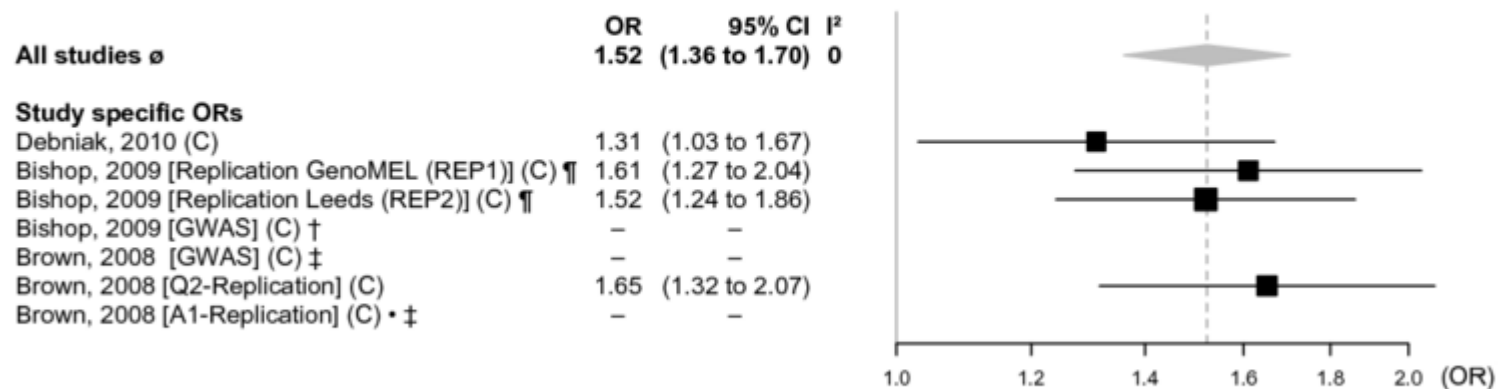

**Supplementary Figure 2.** Forest plots of random-effects meta-analyses using allelic contrasts for polymorphisms showing statistically nominally significant ( $P < .05$ ) summary odds ratios (ORs). Random-effects summary odds ratios and 95% confidence intervals (CIs) were calculated by the DerSimonian Laird model (29). Data from reports published before July 31, 2010 were included in the meta-analyses for **A)** *ASIP* (rs6058017), **B)** *CDKN2A* (rs11515), **C)** *CDKN2A* (rs3088440), **D)** *MC1R* (R213W), **E)** *MC1R* (rs11547464 [R142H]), **F)** *MC1R* (rs1805005 [V60L]), **G)** *MC1R* (rs1805006 [D84E]), **H)** *MC1R* rs1805007 (R151C), **I)** *MC1R* (rs1805008 [R160W]), **J)** *MC1R* (rs1805009 [D294H]), **K)** *SLC45A2* (rs16891982), **L)** *TYR* (rs1126809), **M)** *TYR* (rs1042602), **N)** *TYR* (rs1393350), **O)** *TYRP1* (rs1408799), **P)**

*VDR* (rs1544410), **Q**) *CLPTMIL* (rs401681), **R**) *MYH7B* (rs1885120), and **S**) *PIGU* (rs910873). All studies and All excl initial denote the summary odds ratios and 95% confidence intervals after meta-analysis of all studies displayed on the forest plots, and after exclusion of the initial study, respectively. The dotted vertical line indicates the summary odds ratio of the meta-analysis of All studies.  $I^2$  was calculated by the estimate of percentage of between-study heterogeneity that is beyond chance. GWAS = genome-wide association studies, HWE = Hardy Weinberg Equilibrium. • denotes the initial study. † No data was provided or data was not eligible for inclusion in the meta-analysis. ‡ This dataset was excluded from the meta-analysis because of overlap of patients and/or control subjects in this study with subjects included in another study for the same polymorphism. # A Hardy-Weinberg violation was observed in the controls ( $P \leq .05$ ). ¶ The published odds ratio and 95% confidence interval were used for analysis. i The polymorphism was monomorphic in the respective dataset. ø Meta-analysis of this polymorphism after excluding the initial study was not applicable because of missing data for the initial study or less than three remaining datasets after exclusion of the initial dataset. C indicates the population was of European ancestry. O indicates the study population was of other or mixed ethnicity.

### Supplementary Figure 3

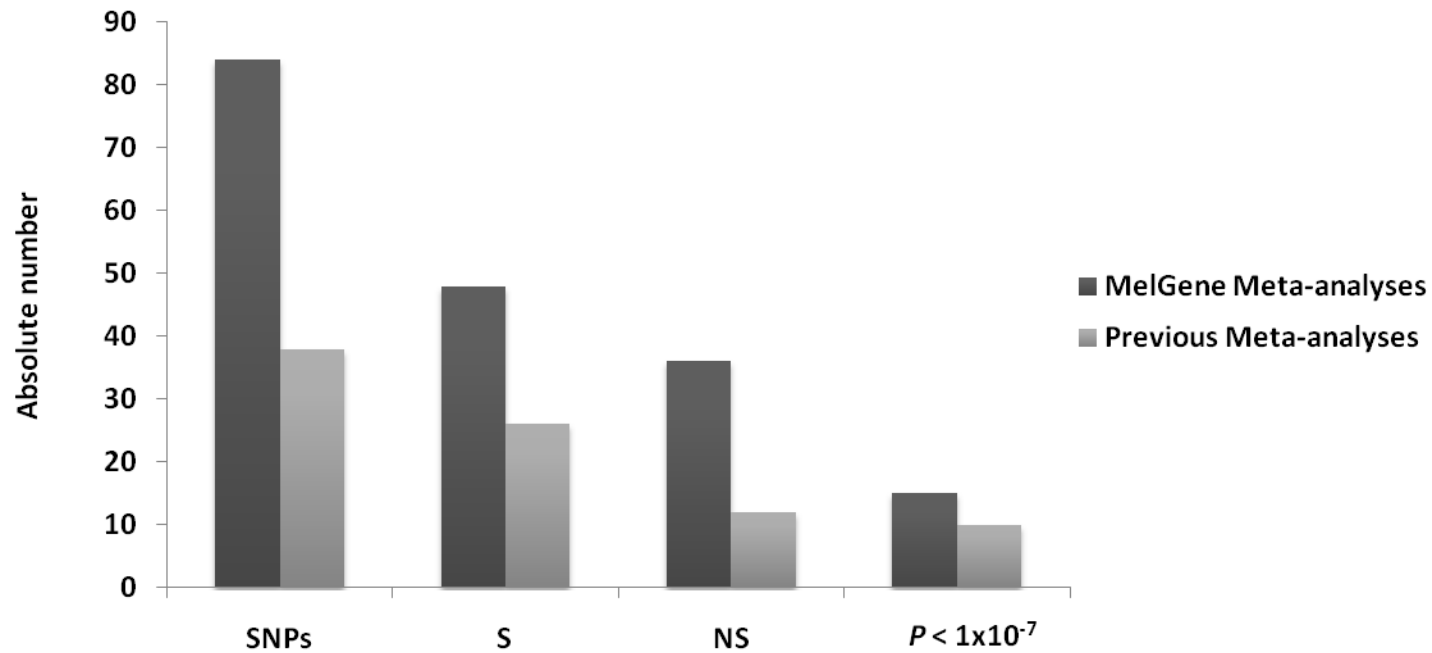

**Supplementary Figure 3.** Comparison of the number of variants, as well as the number of statistically and non-statistically significant results between previously published meta-analyses and meta-analyses performed for this study as of July 31, 2010. SNPs = number of single nucleotide polymorphisms, S = nominally statistically significant results ( $P < .05$ ), NS = non-statistically significant results,  $P < 1 \times 10^{-7}$  = single nucleotide polymorphisms that reached genome-wide significance.
